# Auditory contrast gain control predicts perceptual performance and is not dependent on cortical activity

Michael Lohse\*<sup>1</sup>, Victoria M. Bajo<sup>1</sup>, Andrew J. King<sup>1,2</sup>, and Ben D.B. Willmore<sup>1,2</sup>

<sup>1</sup>Department of Physiology, Anatomy, and Genetics. University of Oxford, Oxford OX1 3PT, United Kingdom.

<sup>2</sup>Joint senior authors.

## \* CORRESPONDING AUTHOR

Michael Lohse ([michael.lohse@dpag.ox.ac.uk](mailto:michael.lohse@dpag.ox.ac.uk)); Andrew King ([andrew.king@dpag.ox.ac.uk](mailto:andrew.king@dpag.ox.ac.uk))

## ACKNOWLEDGMENTS

The research was funded by a Wellcome trust studentship (WT105241/Z/14/A) to M.L., and a Wellcome Trust Principal Research Fellowship (WT108369/Z/2015/Z) to A.J.K.

## AUTHOR CONTRIBUTIONS

M.L., B.D.B.W. and A.J.K conceived and designed the research. M.L. performed and visualized research. M.L. and B.D.B.W. analyzed the data. M.L. and A.J.K. acquired funding for the research. M.L., B.D.B.W. and A.J.K. interpreted the research. M.L., B.D.B.W., V.M.B. and A.J.K. wrote the manuscript.

## CONFLICT OF INTEREST

The authors declare no conflict of interest

## 1 Abstract

2 Neural adaptation enables sensory information to be represented optimally in the brain  
3 despite large fluctuations over time in the statistics of the environment. Auditory contrast gain  
4 control represents an important example, which is thought to arise primarily from cortical  
5 processing. We find, however, that neurons in both the auditory thalamus and midbrain of  
6 mice show robust contrast gain control, and that this is implemented independently of cortical  
7 activity. Although neurons at each level exhibit contrast gain control to similar degrees,  
8 adaptation time constants become longer at later stages of the processing hierarchy, resulting  
9 in progressively more stable representations. We also show that auditory discrimination  
10 thresholds in human listeners compensate for changes in contrast, and that the strength of  
11 this perceptual adaptation can be predicted from physiological measurements. Contrast  
12 adaptation is therefore a robust property of both the subcortical and cortical auditory system  
13 and accounts for the short-term adaptability of perceptual judgments.

14

## 15 Introduction

16 Adaptation to stimulus statistics is a fundamental principle of sensory processing<sup>1-3</sup>, which  
17 enables the brain to represent sensory information in ways that are computationally  
18 efficient<sup>3,4</sup> and robust to noise<sup>5,6</sup>. Certain forms of adaptation to stimulus statistics have been  
19 well studied and are known to be present at early sensory processing levels. In the visual  
20 system, for example, retinal responses adapt to mean light intensity<sup>7</sup>, while in the auditory  
21 system, adaptation to mean sound level has been demonstrated at the level of the auditory  
22 nerve<sup>8-10</sup>. Nevertheless, it remains poorly understood how adaptation to higher stimulus  
23 statistics changes as a result of hierarchical processing within the sensory systems or how this  
24 links to perception.

25 In both the visual and auditory systems, neurons adapt to stimulus contrast – that is,  
26 the variability of light or sound level<sup>11-13</sup>. The dominant effect of contrast adaptation is to alter  
27 neuronal gain so as to compensate for the distribution of stimulus levels in a given sensory  
28 environment<sup>11-13</sup>. This is therefore known as contrast gain control (or contrast normalization).  
29 Visual contrast gain control is implemented at several stages of the visual system<sup>12-20</sup>, and is  
30 partially guided by corticofugal projections from primary visual cortex<sup>21</sup>. The perceptual  
31 consequences of contrast adaptation are controversial, although one report suggests that this

32 enhance the ability of observers to detect subsequent contrast changes<sup>22</sup>. In the auditory  
33 system, however, the relative contributions of subcortical and cortical structures and their role  
34 in contrast gain control have not yet been fully elucidated, and it is not known how contrast  
35 gain control affects perception.

36 Contrast gain control is a prominent feature of neuronal responses in the auditory  
37 cortex of mice<sup>23</sup> and ferrets<sup>11</sup>, but in ferrets is less robust in the midbrain<sup>6</sup>. Although this  
38 implies a primary role for auditory cortex in contrast gain control, recent studies have shown  
39 that thalamic neurons can change their responses according to sensory, motor and cognitive  
40 demands<sup>24–27</sup> (reviewed in ref. 28), suggesting that they may also contribute to adaptation to  
41 stimulus statistics. Furthermore, descending influences from the cortex need to be considered:  
42 manipulation of auditory corticofugal projections can alter the excitability and tuning  
43 properties of neurons in both the thalamus<sup>29–32</sup> and midbrain<sup>30,31,33,34</sup>, but their involvement in  
44 adaptation to stimulus statistics remains largely unexplored<sup>8</sup>.

45 In this study, we demonstrate the effects of contrast adaptation on human  
46 perception, by showing that acuity in a level discrimination task is rapidly adjusted to partially  
47 match changes in sound contrast. We also show physiologically that auditory contrast gain  
48 control is present to comparable degrees in the lemniscal auditory midbrain, thalamus, and  
49 primary auditory cortex of mice, with progressive increases in temporal stability at each  
50 ascending processing level. Surprisingly, cortical silencing has no effect on subcortical contrast  
51 gain control, despite significant effects on neuronal excitability, suggesting that the midbrain  
52 and thalamus implement adaptation independently of cortex. Finally, we show that the  
53 strength of perceptual contrast adaptation can be predicted from the physiological contrast  
54 adaptation observed in auditory neurons.

55

## 56 Results

### 57 Sound level discrimination in human listeners is modulated by auditory contrast

58 To examine the perceptual consequences of changing the contrast of auditory stimuli, we  
59 measured the ability of human participants to discriminate the levels of two broadband noise  
60 stimuli presented in different contrast environments. The stimuli were 100 ms snippets of  
61 band-limited noise, separated by 250 ms, and flanked by dynamic random chords (DRCs) with  
62 either 10 dB or 30 dB contrast (Fig. 1a). We found that level discrimination performance

63 improved when the contrast of the flanking DRCs was low (Fig. 1b), and that this effect was  
64 not the result of small contrast-dependent differences in overall sound level that are inherent  
65 to the DRC stimuli (Supplementary Fig. 1; see Methods). All participants ( $n = 8$ ) showed this  
66 increase in sensitivity ( $t(7) = 5.2$ ,  $p = 0.003$ ,  $n = 8$ ), as measured using the just noticeable  
67 difference (JND, the dB difference between the 25% and 75% points on a fitted psychometric  
68 curve; Fig. 1c). The JND increased by a mean of 38.8% between low and high contrast  
69 conditions (a threefold change in stimulus contrast), corresponding to 28.8% compensation for  
70 contrast change.

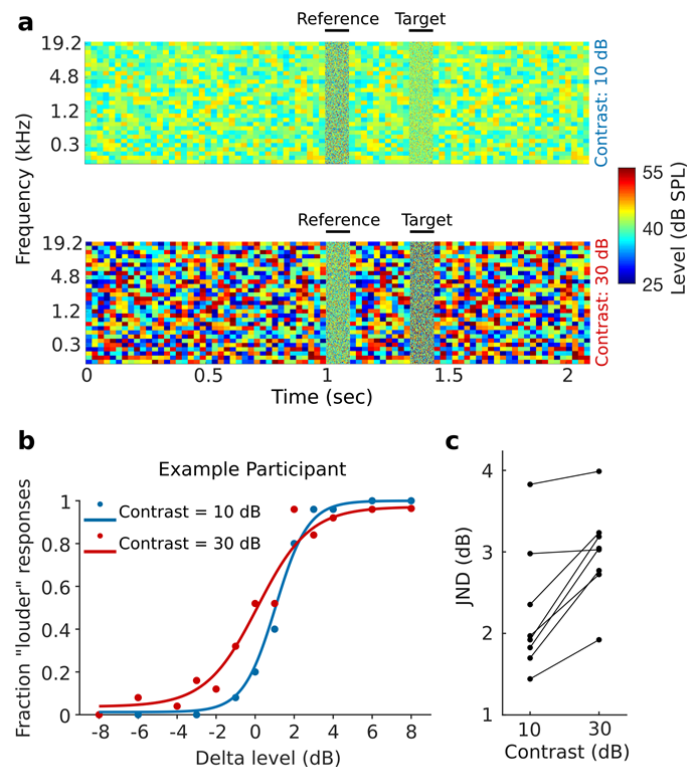

71

72 **Fig. 1 Sensitivity to sound level differences in human listeners improves with decreasing auditory**  
73 **contrast.** **a**, Spectrogram illustrating 2-alternative forced-choice sound level discrimination task in  
74 different contrast environments (dynamic random chords) for human listeners. Participants were  
75 instructed to judge whether the target sound (100 ms broadband noise) was “quieter” or “louder” than  
76 the reference sound (also 100 ms broadband noise). **b**, Examples of psychometric functions from one  
77 participant for sound level discrimination in low (10 dB, blue) and high (30 dB, red) contrast conditions.  
78 **c**, Changes in just noticeable difference (JND, difference in dB between 25% and 75% points on  
79 psychometric curve) across participants.

80

81

## 82 Robust contrast gain control in the auditory midbrain, thalamus and cortex

83 In order to understand the role of different sensory processing levels in auditory contrast  
84 adaptation, we recorded extracellular activity from neurons in the lemniscal areas of the  
85 auditory midbrain (central nucleus of the inferior colliculus, CNIC), thalamus (ventral division  
86 of the medial geniculate body, MGBv), and primary auditory cortex (A1) of anesthetized mice  
87 while playing complex spectro-temporal stimuli (DRCs, see Methods) with either high (40 dB)  
88 or low (20 dB) contrast (Fig. 2a-c, 3a). We fitted separate spectro-temporal receptive fields  
89 (STRFs) to the responses of each neuron in high and low contrast conditions and measured  
90 various STRF properties in both conditions (Supplementary Fig. 2). We concluded that the  
91 differences in tuning were small enough that it was appropriate to fit a single STRF to all the  
92 data from each neuron (Fig. 2d, 2e, 3b). We then fitted an output nonlinearity for each  
93 contrast condition (Fig. 2f, 3c). Contrast adaptation in auditory neurons was assessed by  
94 comparing the output nonlinearities in high and low contrast conditions (see Methods).

95 As predicted from previous studies<sup>11,23</sup>, we found that neurons in A1 exhibited strong  
96 contrast gain control – i.e., the slope of the output nonlinearity was adjusted following a  
97 change in contrast – and that this gain control largely compensated for the difference in  
98 stimulus contrast (Fig. 2f, 3c, 3d). In auditory cortex, the median degree of compensation was  
99 70.2% ( $p = 9.6 \times 10^{-14}$ ,  $n = 106$  units, 10 mice, Wilcoxon signed-rank test). Surprisingly, we also  
100 found strong compensatory contrast gain control in MGBv (median = 55%,  $p = 3.6 \times 10^{-16}$ ,  $n =$   
101 136 units, 8 mice) and CNIC (median = 70.8%,  $p = 1.7 \times 10^{-64}$ ,  $n = 499$  units, 13 mice; Fig. 3d). A  
102 Kruskal-Wallis test between contrast gain control in CNIC, MGBv, and A1 revealed no  
103 significant differences ( $p = 0.31$ ). These results show that neurons in CNIC, MGBv and A1  
104 substantially compensate for changes in stimulus contrast by adjusting the gain of their input-  
105 output relationships. These findings were not sensitive to the specific inclusion criteria used in  
106 this study (Supplementary Fig. 3).

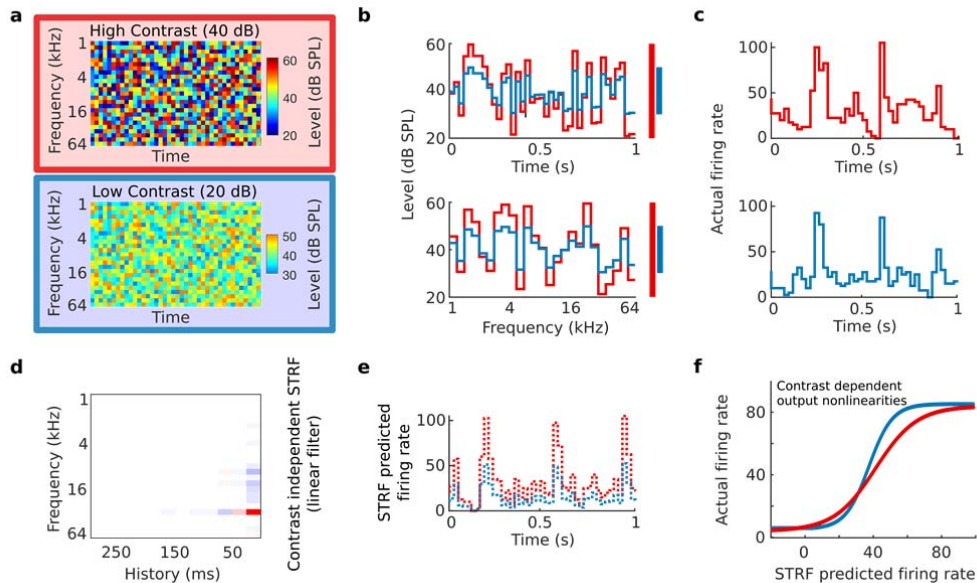

107

108 **Fig. 2 Stimulus paradigm for electrophysiological experiments and schematic of linear-nonlinear**  
 109 **contrast-dependent model of auditory neurons. a**, Spectrograms of 1-second snippets of DRCs with  
 110 high (red) or low (blue) contrast. **b**, Cross-section through an example frequency channel (top) and  
 111 time point (bottom) of DRCs. Colored bars indicate the sound level range for high (red) and low (blue)  
 112 contrast. **c**, Example peri-stimulus time histograms (PSTHs) during DRC stimulation with high (top) and  
 113 low (bottom) contrast DRCs. **d**, Spectro-temporal receptive field (STRF) describing the best-fit linear  
 114 relationship between stimulus structure and the response of an example neuron. **e**, Example of 1  
 115 second of predicted neuronal response to DRCs with high (red) and low contrast (blue), based on the  
 116 linear STRF model. **f**, Sigmoidal contrast-dependent output nonlinearities for an example unit, modeling  
 117 the relationship between the actual responses of the unit under high (red) and low (blue) contrast  
 118 conditions and the predicted responses of the STRF linear model.

119

120

121 Rabinowitz et al.<sup>11</sup> found no difference in contrast gain control in cortical neurons  
 122 between awake and anesthetized ferrets. We extended this observation by examining  
 123 whether anesthesia affected contrast gain control in the CNIC. We repeated our recordings in  
 124 the CNIC of awake, passively listening, head-fixed mice. We found that contrast gain control  
 125 was robustly present in the CNIC of awake mice (median = 63.9% compensation,  $p = 1.2 \times 10^{-50}$ ,  
 126  $n = 380$ , 6 mice, Wilcoxon signed-rank test), and indistinguishable in magnitude from that  
 127 exhibited by CNIC units under anesthesia ( $p = 0.1$ , Wilcoxon rank-sum test; Fig. 3c, d). A

128 control experiment confirmed that these effects could not be attributed to small changes in  
 129 overall sound level between high and low contrast stimuli (Supplementary Fig. 4).

130 We also determined whether the baseline firing rate during DRC stimulation – i.e. the  
 131 y-offset of the output nonlinearity – was altered by contrast. We found that baseline firing  
 132 rates in CNIC were unaffected by contrast in both anesthetized ( $p = 0.46$ , Wilcoxon signed-  
 133 rank test) and awake mice ( $p = 0.74$ ). However, significant decreases in baseline firing rates  
 134 were measured in both MGBv ( $-18.5\%$  median change,  $p = 9.4 \times 10^{-7}$ , Wilcoxon signed-rank  
 135 test) and A1 ( $-8.8\%$  median change,  $p = 3.1 \times 10^{-9}$ ) during high contrast stimulation, potentially  
 136 providing an additional mechanism to make overall firing rates invariant to contrast at these  
 137 higher levels of the auditory pathway (Fig. 3e).

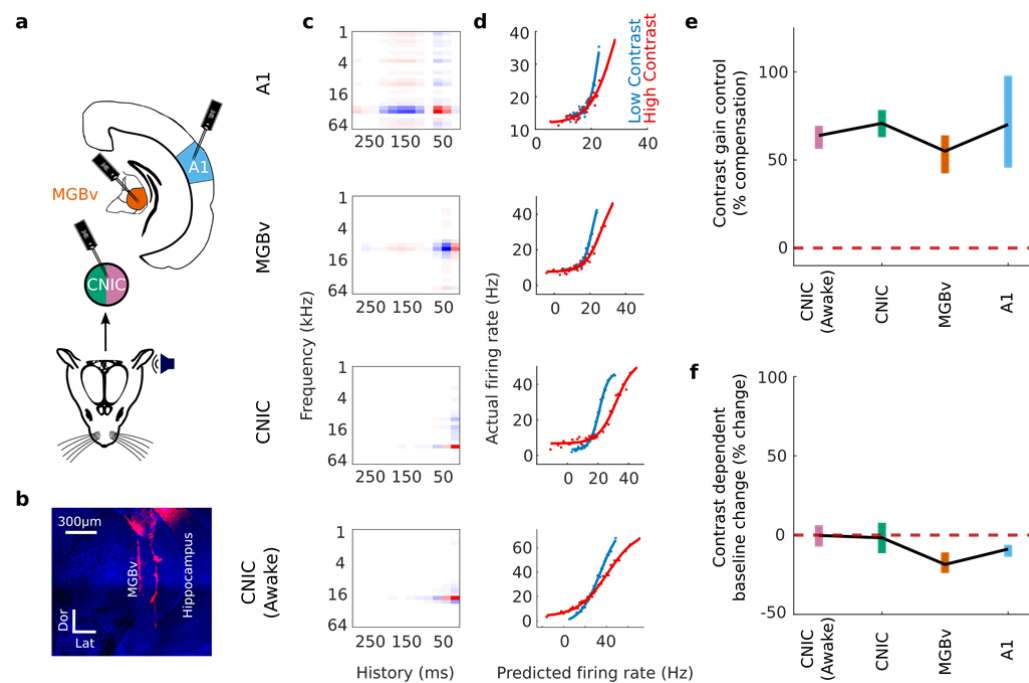

138

139 **Fig. 3 Contrast adaptation in the lemniscal auditory pathway.** **a**, Schematic illustrating recordings in A1  
 140 and MGBv (under anesthesia) and in the CNIC (in both anesthetized and awake mice). **b**, Confocal image  
 141 showing Dil-coated electrode tracks in the MGBv (Dor, dorsal, Lat, lateral). **c**, Example STRFs from units  
 142 recorded in each brain region. **d**, Contrast-dependent output nonlinearities for these same four units. **e**,  
 143 Magnitude of contrast gain control in the auditory pathway, measured as % compensation where 100%  
 144 would indicate a halving of the gain when the contrast is doubled. **f**, Contrast-dependent changes in the  
 145 baseline activity (y-offset of the output nonlinearity) in the auditory pathway. Colored error bars in **e**, **f**,  
 146 95% bootstrapped non-parametric confidence intervals.

147

148

### 149 [A role for cortex in controlling subcortical response excitability and reliability](#)

150 Although the auditory cortex has been found to heavily influence the subcortical processing of  
151 simple tones<sup>29,31,35</sup>, little is known about its contribution to the representation of complex  
152 sounds in the thalamus or midbrain. In order to understand the role of descending corticofugal  
153 projections in the implementation of contrast gain control, we first examined the effect of  
154 cortical inactivation on the activity of subcortical neurons during continuous DRC stimulation.

155 Transiently silencing auditory cortex by optogenetic activation of inhibitory neurons  
156 (Supplementary Fig. 5) reduced the mean firing rate of MGBv units ( $n_{\text{MGBv}} = 102$ , 5 mice) during  
157 both high contrast ( $-23.6\%$  median change,  $p = 4.2 \times 10^{-18}$ , Wilcoxon signed-rank test) and low  
158 contrast ( $-31.3\%$  median change,  $p = 3.4 \times 10^{-18}$ ) stimulation, as well as the standard deviation  
159 of the firing rate across time (high contrast:  $-15.8\%$  median change,  $p = 7.8 \times 10^{-17}$ ; low  
160 contrast:  $-23.1\%$  median change,  $p = 2.1 \times 10^{-17}$ ) (Fig. 4a, b). Similar but weaker effects of  
161 cortical silencing were found in the CNIC of awake mice (Supplementary Fig. 6).

162 Given these strong effects on MGBv activity, and to a lesser degree on CNIC activity,  
163 we examined whether corticofugal input influenced the structure of the STRFs in these  
164 subcortical regions. We measured the effects of cortical silencing on BF, spectral bandwidth,  
165 temporal bandwidth, and on the value of the largest weight in the spectral kernel (i.e. the BF  
166 weight). We found that silencing auditory cortical activity had no effect on either the shape of  
167 the STRFs of MGBv units (Fig. 4d-g) or CNIC units (Supplementary Fig. 6) ( $p > 0.05$ , Wilcoxon  
168 signed-rank tests).

169 Surprisingly, the reliability (NP/SP) of responses to DRC stimuli was increased (i.e.,  
170 lower NP/SP) in both MGBv ( $-23.8\%$  median change,  $p = 1.0 \times 10^{-6}$  Wilcoxon signed-rank test),  
171 and CNIC of awake mice ( $-11.4\%$  median change,  $p = 6.0 \times 10^{-6}$ ) when cortex was silenced (Fig.  
172 4h, Supplementary Fig. 6). We also found that after silencing auditory cortex, neurons were  
173 better described by a linear model in the MGBv ( $14.9\%$  median change,  $p = 8.0 \times 10^{-6}$ ; Fig. 4i)  
174 and in the CNIC of awake mice ( $4.0\%$  median change,  $p = 8.0 \times 10^{-6}$ ; Supplementary Fig. 6).

175 These results demonstrate that despite providing a strong excitatory input to MGBv,  
176 and to a lesser extent the CNIC, the auditory cortex does not contribute to the receptive field  
177 structure of their neurons, but instead influences the reliability and linearity of thalamic  
178 responses to complex sounds.



179

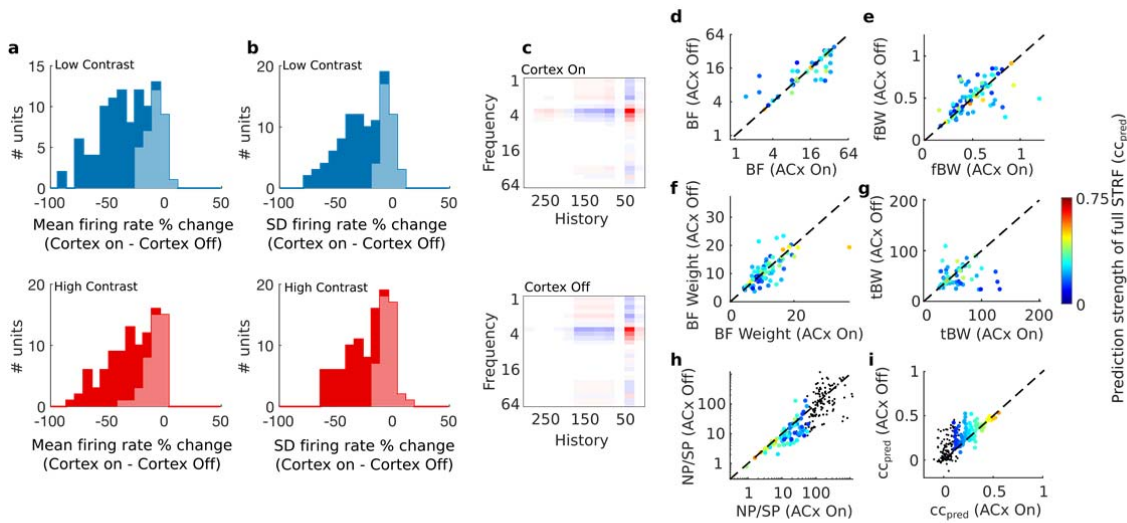

180

181 **Fig. 4. Silencing auditory cortex decreases excitability in MGBv while increasing reliability and**  
 182 **linearity of spectro-temporal responses, but leaves STRF parameters unaffected. a,** Change in mean  
 183 firing rate in MGBv during low contrast (top, blue) and high contrast (bottom, red) DRC stimulation  
 184 following optogenetic cortical silencing. **b,** Change in standard deviation (SD) of firing rate in MGBv  
 185 during low contrast (top) and high contrast (bottom) DRC stimulation following optogenetic cortical  
 186 silencing. Light shaded areas in a and b indicate units that were not significantly modulated by cortical  
 187 silencing, while dark areas represent units that were affected by cortical silencing ( $p < 0.05$ , t-test). **c,**  
 188 Example STRF of an MGBv unit with auditory cortical activity intact (top), or auditory cortex  
 189 optogenetically silenced (bottom). **d,** Comparison of the best frequency (BF), i.e., the largest value of  
 190 the spectral kernel of the STRF, of MGBv units between recordings made with auditory cortical activity  
 191 intact (ACx On) or optogenetically silenced (ACx Off). **e,** Frequency bandwidth (fBW), i.e., the full width  
 192 half maximum (in octaves) around the BF, of MGBv units with and without cortical silencing. **f,** Weight  
 193 of the BF (BF weight) in the spectral kernel of the STRF of MGBv units with and without cortical  
 194 silencing. **g,** Temporal bandwidth (tBW), i.e., the full width half maximum (in ms) around the largest  
 195 value of the temporal kernel of the STRF, of MGBv units with and without cortical silencing. **h,** The ratio  
 196 between noise and signal power (NP/SP) in the MGBv with and without cortical silencing. **i,** Linear  
 197 model prediction performance within contrast (cross-validated correlation between predicted and  
 198 actual responses) in the MGBv with and without cortical silencing. Color of points in d-i denotes the  
 199 prediction strength (correlation coefficient) of the model on a cross-validated dataset. Black dots are  
 200 units excluded from analysis, according to exclusion criteria described in the Methods.

201

## 202 Subcortical contrast gain control is independent of cortical activity

203 Given the effects of cortical silencing on subcortical responses, it is possible that contrast gain  
204 control in MGBv and CNIC neurons might reflect a context-dependent influence of the  
205 extensive corticofugal pathways on each of these subcortical structures<sup>36</sup>. Alternatively,  
206 subcortical contrast adaptation could be the result of independent computations in the CNIC  
207 and/or MGBv. We addressed this directly by optogenetic silencing of auditory cortex while  
208 recording from the CNIC and MGBv and presenting DRCs with either high (40 dB) or low (20  
209 dB) contrast (Fig. 5). We fitted separate output nonlinearities to each condition (4 conditions)  
210 from a linear spectro-temporal prediction across all conditions (cortex silenced or intact, with  
211 high or low contrast stimuli) (Fig. 5a, b).

212 We found that subcortical contrast gain control in anesthetized mice was not affected  
213 by transient optogenetic cortical silencing. This was the case for units in both MGBv ( $p = 0.1$ ,  $n$   
214  $= 99$ , 5 mice, Wilcoxon signed-rank test) and CNIC ( $p = 0.5$ ,  $n = 169$ , 5 mice) (Fig. 5b, c). To  
215 control for anesthetic state, we carried out optogenetic cortical silencing in awake head-fixed  
216 mice while recording from CNIC. Again, we found no effect on contrast gain control in the  
217 CNIC ( $p_{\text{CNIC\_Awake}} = 0.3$ ,  $n_{\text{CNIC\_Awake}} = 129$ , 3 mice) (Fig. 5b, c).

218 We also examined whether auditory cortex contributes to the effects of contrast on the  
219  $\gamma$ -offset in the MGBv. Cortical silencing did not affect this value in MGBv units ( $p_{\text{MGBv}} = 0.054$ ,  
220  $n_{\text{MGBv}} = 99$ , 5 mice), suggesting that the contrast-dependent change in  $\gamma$ -offset adaptation is  
221 also independent of cortical activity (Fig. 5d). These results therefore suggest that auditory  
222 cortex does not provide the basis for the auditory contrast adaptation (gain control and  $\gamma$ -  
223 offset adaptation) exhibited by subcortical neurons.

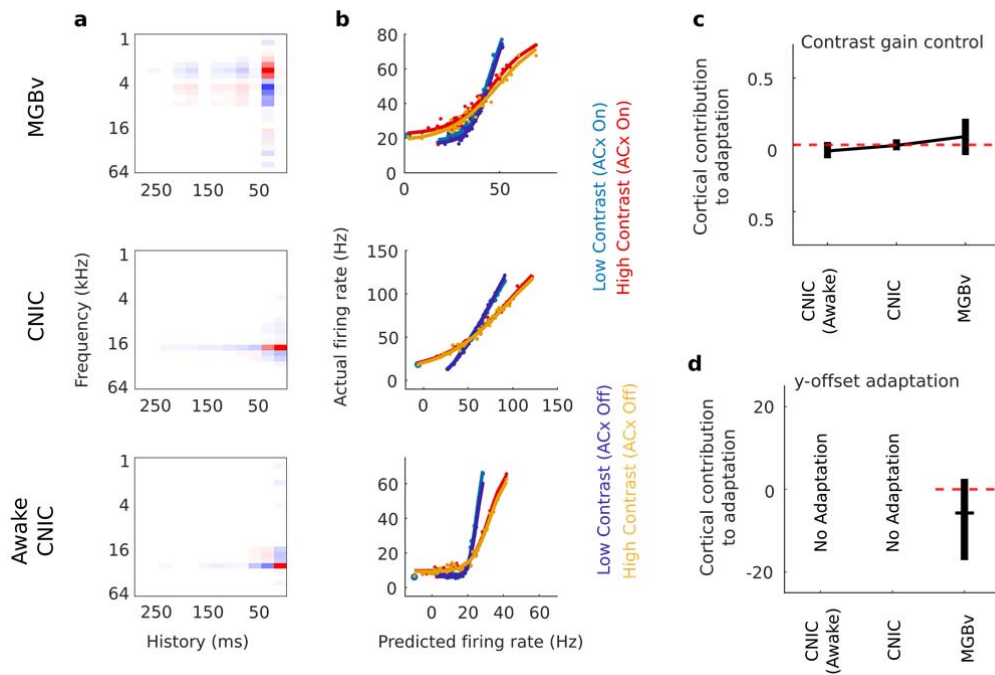

224

225 **Fig. 5 Contrast adaptation in the CNIC and MGBv is unaffected by silencing of auditory cortex.** **a**,  
 226 Examples of spectro-temporal receptive fields of units recorded in MGBv and CNIC of anesthetized mice  
 227 and in CNIC of awake mice. **b**, The output nonlinearities of the same units during high and low contrast  
 228 stimulation, with or without silencing of cortex. **c**, Summary of effects of cortical silencing on contrast  
 229 gain control in units recorded in MGBv and CNIC of anesthetized mice and CNIC of awake mice; this was  
 230 quantified as the % gain change with cortex silenced minus the % gain change with cortex intact. **d**,  
 231 Summary of effects of cortical silencing on contrast-dependent  $\gamma$ -offset adaptation in the MGBv; this  
 232 was quantified as % adaptation with cortex silenced minus % adaptation with cortex intact. No contrast-  
 233 dependent  $\gamma$ -offset changes were observed in the CNIC, so the effects of cortical silencing are not  
 234 shown. **c**, **d**, Horizontal lines, median; error bars, 95% bootstrapped non-parametric confidence  
 235 intervals of the medians.

236

### 237 [Dynamics of contrast adaptation slow down along the ascending auditory](#) 238 [pathway](#)

239 To assess the dynamics of contrast adaptation at different levels of the auditory pathway, we  
 240 collected an additional dataset with recordings (under anesthesia) from CNIC ( $n = 155$  units, 4  
 241 mice), MGBv ( $n = 56$  units, 4 mice) and A1 ( $n = 73$  units, 4 mice). We presented DRCs whose  
 242 contrast switched between high (40 dB) and low (20 dB) values every 2 seconds. We modeled  
 243 responses (Fig. 6a) to this switching DRC using an expanded contrast-dependent LN model,

244 where the parameters of the output nonlinearity were allowed to decay exponentially  
245 between high- and low-contrast states with a time constant  $\tau$ .

246 In the CNIC, time constants were very fast (median  $\tau_{\text{CNIC}} = 28$  ms), indicating that  
247 substantial adaptation occurred during the first chord (duration 25 ms) after each spectro-  
248 temporal contrast transition (Fig. 6b). For many CNIC units, the inclusion of an adaptation time  
249 constant did not improve predictions over the standard contrast-dependent LN model. This  
250 further suggests that adaptation was rapid compared to the chord duration. Adaptation time  
251 increased with each ascending sensory processing step (median  $\tau_{\text{MGBv}} = 79$  ms; median  $\tau_{\text{A1}} =$   
252 175 ms) (Kruskal-Wallis test,  $p < 0.001$ ), with post-hoc comparisons (Dunn-Sidak corrected)  
253 demonstrating significantly longer median adaptation times from CNIC to MGBv ( $p < 0.05$ ) and  
254 from MGBv to A1 ( $p < 0.05$ ) (Fig. b).

255 In accordance with this increase in adaptation time from the midbrain to the cortex,  
256 the inclusion of an adaptation time constant in the contrast-dependent LN model also became  
257 increasingly important. While including adaptation time as a parameter in the contrast-  
258 dependent LN model improved the prediction of neural activity in only 14.9% of CNIC units,  
259 this increased to 25.0% in MGBv, and to more than half the units recorded in A1 (54.8%; black  
260 bars in Fig. 6b). A subset of units was estimated to have the maximum time constant allowed  
261 by the model (700 ms, because longer time constants could not be reliably estimated using  
262 stimuli whose contrast switched every 2 seconds). This is likely to be a ceiling effect, and  
263 suggests that a subset of units have time constants that may be longer than this. Units  
264 estimated to have these long time constants were most frequently found in A1.

265 The progressive increase in time constants might result from differences in the  
266 temporal resolution of spectro-temporal representations at different processing levels.  
267 Indeed, the temporal bandwidth (estimated as the full width half maximum of the temporal  
268 kernel in a separable STRF) differed between units recorded at each level (Kruskal-Wallis test,  
269  $p = 1.1 \times 10^{-12}$ ; Fig. 6c). Post-hoc comparisons revealed significantly (Dunn-Sidak corrected)  
270 shorter temporal bandwidths in CNIC relative to both A1 ( $p < 0.05$ ) and MGBv ( $p < 0.05$ ). Units  
271 in MGBv had intermediate values between CNIC and A1, but these were not significantly  
272 different from A1 ( $p > 0.05$ ). However, within each auditory structure, we did not find a  
273 correlation between temporal bandwidths and contrast adaptation time constants (Spearman  
274 correlation,  $p > 0.10$ ). Thus, although both parameters increase in value along the auditory

275 pathway, temporal bandwidth does not in itself account for the increase in contrast  
 276 adaptation time.

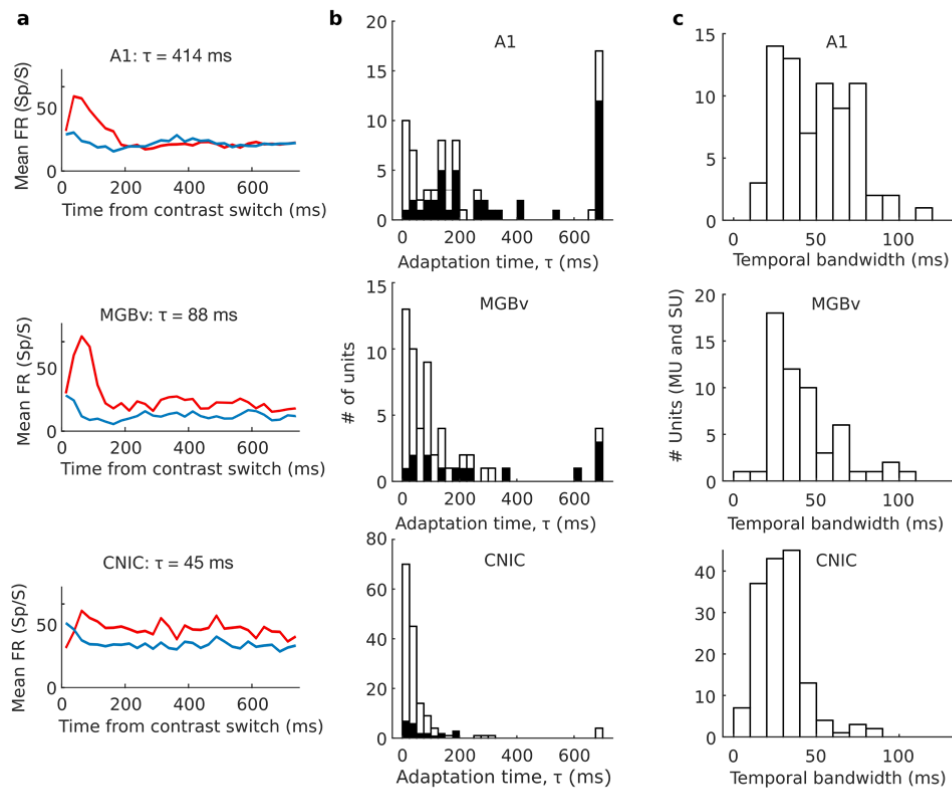

277  
 278 **Fig. 6 Increasing time constants of contrast adaptation along the ascending auditory pathway. a,**  
 279 Mean PSTHs from example units recorded in A1, MGBv and CNIC after switching from low to high  
 280 contrast (red) or high to low contrast (blue). **b,** Contrast adaptation time constants ( $\tau$ ) for all units  
 281 recorded using continuously switching contrasts in A1, MGBv and CNIC. Black bars indicate a subset of  
 282 these units whose model prediction performance ( $cc_{pred}$ ) was improved by including an adaptation time  
 283 constant in the contrast-dependent LN model. **c,** Temporal bandwidth of these units.

284

285

286 [Perceptual contrast adaptation can be predicted from neuronal contrast](#)  
 287 [adaptation](#)

288 Having demonstrated that contrast adaptation can be observed both behaviorally and  
 289 physiologically, we explored the link between the two. To do this, we developed a model that  
 290 simulated perceptual judgments in the sound level discrimination task (Fig. 1). This

291 incorporated simulated neural responses, where each simulated neuron was based on the  
 292 contrast-dependent LN model of a real neuron in CNIC, MGBv or A1 (Fig. 7a, Supplementary  
 293 Fig. 7; see Methods).

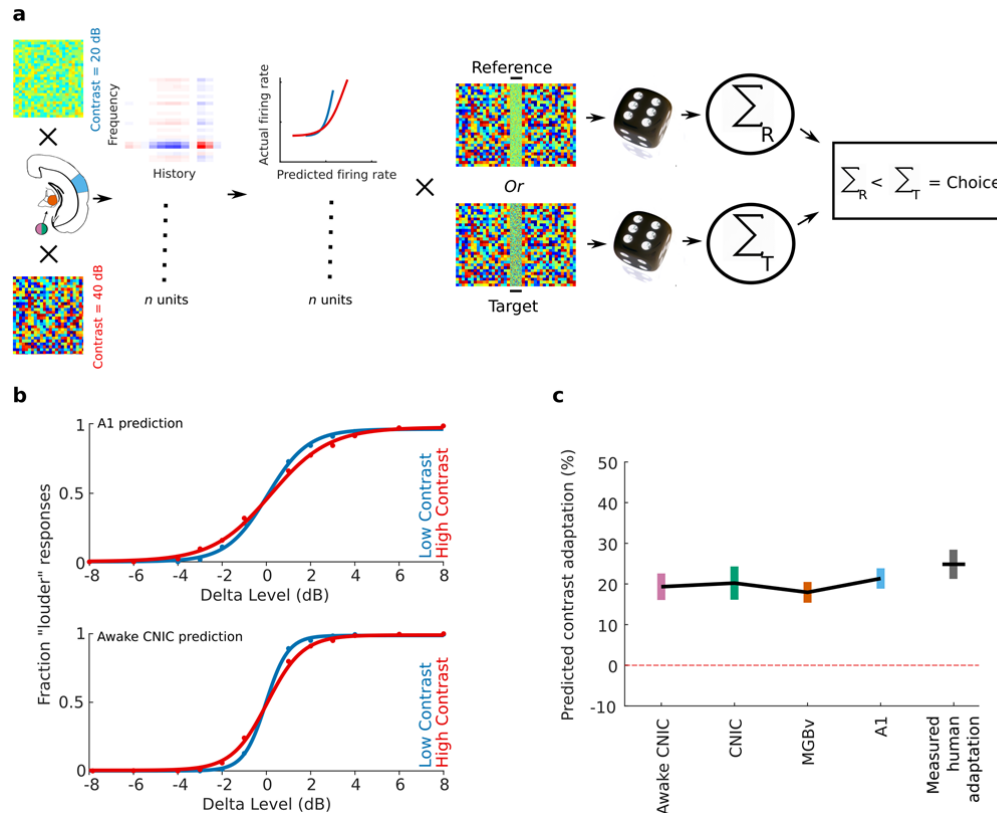

294

295 **Fig. 7 The strength of perceptual contrast adaptation can be predicted from contrast adaptation in**  
 296 **auditory neurons.** **a**, Schematic of model that uses the neuronal responses to predict performance on a  
 297 2-AFC sound level discrimination task (100 ms broadband noise in different contrast environments; see  
 298 Methods). **b**, Psychometric functions produced by the model from A1 units (top) or awake CNIC units  
 299 (bottom) in low (20 dB, blue) and high (40 dB, red) contrast conditions. **c**, Predicted strength of contrast  
 300 adaptation from units recorded in awake CNIC or in CNIC, MGBv or A1 under anesthesia, compared with  
 301 measured perceptual contrast adaptation in human listeners. Line denotes mean values after 25 runs of  
 302 the model (or across the 8 participants in the measured human adaptation). Error bars denote 95%  
 303 confidence intervals around the mean.

304

305 The strength of contrast adaptation predicted by the model at each processing stage  
 306 (mean predicted contrast adaptation: awake CNIC: 19.3%; anesthetized CNIC: 20.2%; MGBv:  
 307 17.9%; A1: 21.4%) closely resembled that measured in human participants performing the

308 contrast-dependent sound level discrimination task (28.8%,  $n = 8$  participants; Fig. 7b, c). No  
309 differences were found between these values (one-way ANOVA,  $p = 0.22$ ), suggesting that the  
310 gain control measured at each level of the auditory pathway is sufficient to account for the  
311 perceptual adaptation exhibited by human listeners.

312

## 313 Discussion

314 Our results demonstrate that auditory contrast adaptation, which has been associated mainly  
315 with the auditory cortex<sup>11,23</sup>, is exhibited to a similar degree by neurons in lemniscal  
316 subcortical structures – the CNIC and MGBv. Moreover, we have shown that this subcortical  
317 adaptation is independent of cortical activity. We also found that perceptual thresholds in a  
318 sound level discrimination task compensate for contrast in a similar way, and that the strength  
319 of perceptual contrast adaptation can be predicted from the gain control exhibited by auditory  
320 neurons.

321

### 322 A hierarchy of auditory contrast adaptation

323 Previous work in the ferret has shown that contrast adaptation is weaker and less consistent in  
324 the CNIC than in A1<sup>6</sup>, and does not consistently compensate for stimulus contrast. In contrast,  
325 the results of this study show that compensatory contrast gain control in mice is not purely a  
326 cortical computation, but is present to a comparable degree in both the lemniscal auditory  
327 midbrain and the thalamus. Although the contrasts used by Rabinowitz et al.<sup>6</sup> were different  
328 from those used in the present study, it is possible that this reflects a difference in subcortical  
329 computations between mouse and ferret. In both species, however, the data suggest a  
330 hierarchy of contrast adaptation, wherein subcortical structures exhibit contrast gain control  
331 but in cortex this becomes more consistent across neurons (in ferrets) or more temporally  
332 stable (in mice). In the visual system, a similar hierarchy of contrast normalization is present at  
333 multiple processing levels from the retina upwards<sup>37</sup>.

334 It is possible that contrast gain control is also exhibited by neurons in more peripheral  
335 structures, particularly as adaptation to mean sound level takes place in the auditory nerve<sup>9</sup>.  
336 However, modelling studies suggest that contrast gain control is present to a very limited  
337 degree in the auditory nerve<sup>6</sup>. In any case, our results show that auditory subcortical neurons

338 can execute contrast gain control without the involvement of cortical activity. A full  
339 understanding of contrast gain control will therefore require new hypotheses to be developed  
340 about the subcortical neural circuitry and mechanisms that underlie this fundamental property  
341 of auditory neurons.

342

### 343 [Stabilization of contrast adaptation along the auditory pathway](#)

344 Although we found that the overall strength of contrast gain control is similar in CNIC, MGBv  
345 and A1, adaptation is not the same at each level of the processing hierarchy. A reduction in  
346 baseline firing rate during high contrast stimulation, which may provide an additional  
347 mechanism for making overall firing rates invariant to contrast, is found only in the MGBv and  
348 A1. Furthermore, the temporal dynamics of contrast gain control change as we ascend the  
349 auditory pathway, suggesting that additional contrast-dependent processing happens at each  
350 level. In keeping with Rabinowitz et al.<sup>6</sup>, we found that the time constants for auditory  
351 contrast gain control become longer at higher levels of the processing hierarchy. This mirrors  
352 previous results showing that the temporal integration window for auditory inputs becomes  
353 longer from the CNIC, through MGBv, to A1<sup>38,39</sup>.

354 The changes we observe in adaptation time constant cannot be accounted for by  
355 temporal bandwidth changes in neuronal STRFs. This suggests that neurons at each processing  
356 level may actively adapt to the recent history of stimulus contrast over a range of timescales,  
357 rather than merely acting as relays for the transmission of auditory contrast. The progressive  
358 increase in the time constant of adaptation along the auditory hierarchy is likely to result in an  
359 increasingly stable representation of the auditory environment in the cortex relative to  
360 subcortical nuclei. Furthermore, the presence of multiple time scales of adaptation at different  
361 levels of the auditory pathway may provide an effective means for representing sounds  
362 presented in different acoustical environments or tasks. Such diversity of dynamics among  
363 different cells also exists for visual contrast adaptation in the retina<sup>16</sup> and adaptation to mean  
364 level in the CNIC<sup>40</sup>, suggesting that this may be a widespread property of sensory systems.

365

### 366 [Contrast gain control as neuronal normalization](#)

367 Contrast gain control in the auditory cortex appears to be a specific case of neuronal  
368 normalization wherein the sensitivity of neurons adjusts to compensate for stimulus



369 contrast<sup>37,41</sup>. It has been suggested that normalization is a canonical computation in sensory  
370 systems and is present at multiple processing levels<sup>37</sup>. The results presented in this study  
371 expand on this idea by demonstrating that contrast gain control is not only a property of  
372 neurons in auditory cortex, where it has been studied most extensively<sup>6,11,23,42</sup>, but, at least in  
373 mice, is equally robust in the CNIC and MGBv. Contrast gain control is therefore established at  
374 a relatively early processing level in the auditory pathway and presumably inherited by  
375 neurons at later stages.

376 Our results demonstrate for the first time an important role for the thalamus in  
377 contrast adaptation, by both increasing the duration of the adaptation time constants and  
378 introducing a subtractive component ( $\gamma$ -offset adaptation) that is subsequently inherited by  
379 cortex. Neither the contrast gain control nor the subtractive component in contrast adaptation  
380 found in the thalamus is dependent on auditory cortical activity. Thus, the thalamus is an  
381 active contributor to contrast adaptation in the ascending auditory pathway, and not merely a  
382 relay from the midbrain to the cortex.

383 The longer adaptation time constants we observe in the cortex suggest that further  
384 contrast-related processing happens there. As the representation of sound features changes  
385 along the ascending auditory pathway<sup>43</sup>, corresponding changes in contrast adaptation may be  
386 required at each successive stage. If that is the case, an important question for future research  
387 will be whether contrast gain control is implemented via different neural architectures, as has  
388 been shown for other neuromodulatory computations<sup>44,45</sup>. Thus, although auditory contrast  
389 normalization can be viewed as a canonical computation in the brain, it is unlikely to be  
390 implemented by a canonical neural circuit.

391

## 392 Corticofugal influences on auditory processing of complex sounds

393 Corticofugal projections have previously been shown to have modulatory effects on the  
394 excitability and tuning properties of neurons in subcortical nuclei in the auditory<sup>29,31,33,34,46-48</sup>,  
395 visual<sup>49,50</sup> and somatosensory<sup>51,52</sup> systems. Several studies have reported a net excitatory  
396 effect of corticothalamic feedback, which can contribute to changes in receptive field  
397 shape<sup>29,31,32,49-51,53,54</sup>. In the auditory system, corticofugal modulation has mostly been assessed  
398 by measuring spontaneous activity and responses to tones and noise<sup>29,31,53,54</sup>, and evidence for  
399 how complex sound processing in the thalamus is affected is sparse. However, recent work

400 suggests that corticothalamic feedback from layer VI of A1 to MGBv contributes to auditory  
401 scene analysis<sup>55</sup>. Furthermore, in the somatosensory system, *in vitro* recordings have  
402 demonstrated that the effects of corticothalamic feedback are dynamic, changing from  
403 suppressive to facilitatory depending on stimulation frequency<sup>56</sup>, suggesting that  
404 corticothalamic input may contribute to context-dependent processing of sensory  
405 information.

406 Our cortical silencing results indicate that while corticofugal inputs have a strong  
407 effect on overall excitability of thalamic neurons (and a weaker effect on the CNIC), the  
408 receptive field properties of neurons in these subcortical structures remain unchanged. The  
409 reduction in excitability induced by transient optogenetic silencing of the auditory cortex, and  
410 the difference in corticofugal effects on CNIC and MGBv, are in accordance with what would  
411 be expected from previous studies of the effects of widespread inactivation of A1 on  
412 subcortical responses to simple stimuli<sup>57</sup>. However, focal silencing or activation of auditory  
413 cortical areas can shift the BF of neurons in both the MGBv and CNIC<sup>30-32</sup>. Manipulating the  
414 activity of frequency-specific regions of auditory cortex may therefore have similar effects on  
415 the structure of the STRFs acquired from complex sounds, which would be consistent with a  
416 potential role for corticofugal feedback in the task-dependent STRF plasticity of auditory  
417 midbrain neurons<sup>58</sup>.

418 It has been proposed on the basis of *in vitro* investigations that corticothalamic  
419 feedback provides synaptic noise, which helps thalamic neurons to integrate synaptic inputs  
420 more linearly<sup>59,60</sup>. However, by isolating the corticofugal contribution to the representation of  
421 ongoing stimuli *in vivo*, our results suggest that corticofugal activity decreases the linear input-  
422 output relationship and the reliability of neuronal responses in the CNIC and MGBv. In the  
423 CNIC, this effect of cortical silencing on the transfer function of the neurons appears to  
424 depend on wakefulness, but in the MGBv was present even under anesthesia, implying that it  
425 is not simply a result of trial-to-trial variability in corticofugal synaptic transmission due to  
426 changes in cognitive state.

427 Although cortical silencing alters the excitability, reliability and linearity of MGBv and  
428 CNIC responses, we found no effect on the strength of contrast gain control. This is consistent  
429 with the lack of effect of widespread cortical cooling on adaptation to mean level by IC  
430 neurons<sup>8</sup>. However, cortical deactivation does prevent the change in the rate of adaptation by  
431 IC neurons following repeated exposure to stimuli with different sound level distributions<sup>8</sup>. It

432 is therefore possible that descending corticofugal inputs might play a role in contrast  
433 adaptation in rapidly changing acoustic environments.

434

#### 435 [A role for auditory contrast adaptation in perception](#)

436 The behavioral consequences of adaptation to stimulus statistics in the auditory system have  
437 received very little attention. Presenting sounds with interaural level differences<sup>61</sup> or  
438 interaural time differences<sup>62</sup> that follow specific statistical distributions results in comparable  
439 adaptive changes in the sensitivity of binaural neurons in the brain and in the perceptual  
440 sensitivity of human listeners. Furthermore, adaptation to mean level and contrast can  
441 improve the decoding of complex sounds from population neuronal activity, potentially  
442 providing a mechanism for establishing noise invariance<sup>6</sup>.

443 Our results directly show for the first time that contrast adaptation affects human  
444 auditory perception, and that the strength of adaptation is predictable from contrast  
445 adaptation in midbrain, thalamic, and cortical auditory neurons. This highlights the importance  
446 of adaptation in regulating both neuronal and perceptual sensitivity according to the ongoing  
447 statistics of the sensory environment. Furthermore, there is evidence that contrast gain  
448 control may mediate the effects of attention on neural processing<sup>63,64</sup>. It would therefore be  
449 interesting to determine whether contrast gain control at different levels of the auditory  
450 system can be differentially modulated depending on the sensory and behavioral contexts in  
451 which sounds occur.

452 The demonstration in this paper of the widespread and robust nature of auditory  
453 contrast adaptation at both physiological and perceptual levels highlights the importance of  
454 this adaptive mechanism, and shows that a complex computation with strong implications for  
455 behavior can be implemented in subcortical circuitry without the need of cortex.

456

457

## 458 METHODS

### 459 Experimental model and subject details

#### 460 Mice

461 All animal experiments were approved by the Committee on Animal Care and Ethical Review  
462 at the University of Oxford and licensed by the UK Home Office (Animal Scientific Procedures  
463 Act, 1986, amended in 2012). Four strains of male and female mice were used in the  
464 electrophysiological experiments: C57BL6/J (Envigo, UK), GAD2-IRES-cre (Jackson Laboratories,  
465 USA), VGAT-ChR2-YFP (Jackson Laboratories, USA), and C57BL6/NTac.Cdh23<sup>65</sup>. C57BL6/J,  
466 GAD2-IRES-cre, and VGAT-ChR2-YFP were 7-12 weeks old at the time of data collection, and  
467 C57BL6/NTac.Cdh23 were 10-20 weeks old at the time of data collection. All experiments were  
468 carried out in a sound-attenuated chamber.

469

#### 470 Humans

471 All procedures conformed to ethical standards approved by the Inter-divisional Research  
472 Ethics Committee at the University of Oxford (R52936/RE001). Eight (4 male, 4 female) (plus  
473 two additional participants (both male) for the level control experiment) human  
474 participants (18-30 years old) with normal audiometry participated in the contrast-  
475 dependent sound level discrimination study. All experiments were carried out in a  
476 sound-attenuated chamber.

477

### 478 Method details

#### 479 Electrophysiology

##### 480 *Stimuli*

481 Stimuli were presented with a Tucker-Davis Technologies (TDT) RX6 Multifunction processor at  
482 ~200 kHz. Sounds were amplified by a TDT SA1 stereo amplifier and delivered via a modified  
483 Avisoft ultrasonic electrostatic loudspeaker (Vifa) positioned approximately 1 mm from the ear  
484 canal. The sound presentation system was calibrated to a flat ( $\pm 1$  dB) frequency-level response  
485 between 500 and 64,000 Hz.

486 Stimuli consisted of dynamic random chords (DRCs) with individual chords having a  
487 duration of 25 ms (including 5 ms on and off ramps) and comprising 25 superposed  
488 frequencies logarithmically spaced between 1,000 and 64,000 Hz ( $1/4^{\text{th}}$  octave intervals). The  
489 tones of the DRC were played at sound levels that were randomly drawn from one of two  
490 uniform distributions: 30 – 50 dB SPL (low contrast) or 20 – 60 dB SPL (high contrast). The  
491 mean of the distribution was therefore constant, at 40 dB SPL. The logarithmic statistics of the  
492 decibel scale have been found to better match the statistics of natural sounds<sup>39,66</sup>. The overall  
493 sound level of the DRCs was calibrated to be 79-83 dB SPL. A DRC for any given trial was  
494 played for either 40 seconds or 5 seconds (5-second trial duration in optogenetic  
495 experiments), with inter-trial intervals of 2-10 seconds. DRCs have previously been used to  
496 assess contrast adaptation in the auditory system of ferrets and mice<sup>6,11,23,42</sup>.

497 The overall sound level of high contrast stimuli was slightly ( $\sim 3$  dB) higher than that of  
498 the low contrast stimuli, due to the nonlinearity inherent in the logarithmic scale. An  
499 additional experiment was therefore carried out in which the overall sound levels of DRCs was  
500 matched in low and high contrast stimuli, at the expense of equality of sound levels of  
501 individual tones in the DRCs, to control for possible effects of this small difference in overall  
502 sound amplitude (see Supplementary Fig. 4).

503

#### 504 *In vivo extracellular recording*

505 We carried out extracellular recordings using 32- or 64-channel silicon probes (NeuroNexus  
506 Technologies Inc.), in a 4 x 8, 8 x 8, or 2 x 32 electrode configuration. Electrophysiological data  
507 were acquired on a Tucker-Davis technologies (TDT) RZ2 BioAmp processor and collected and  
508 saved using custom-written Matlab code (<https://github.com/beniamino38/benware>).

509 For experiments carried out under anesthesia, mice were anesthetized with an  
510 intraperitoneal injection of ketamine ( $100 \text{ mg kg}^{-1}$ ) and medetomidine ( $0.14 \text{ mg kg}^{-1}$ ). We also  
511 administered intraperitoneal injections of atropine (Atrocare,  $1 \text{ mg kg}^{-1}$ ) to prevent  
512 bradycardia and reduce bronchial secretions, and dexamethasone (Dexadreson,  $4 \text{ mg kg}^{-1}$ ) to  
513 prevent swelling of the brain. Prior to initial surgery, bupivacain was administered as an  
514 analgesic under the scalp. The depth of anesthesia was monitored via the pedal reflex and  
515 small additional doses of the ketamine/medetomidine mix were given subcutaneously  
516 approximately every 15 minutes once the recordings started ( $\sim 1$ -1.5 hour post induction of

517 anesthesia). The dosage of individual top-ups depended on the depth of anesthesia at the  
518 time, but corresponded to ~50 mg/kg/h of ketamine and ~0.07 mg/kg/h of medetomidine. All  
519 recordings were performed in the right hemisphere. A silver reference wire was positioned in  
520 visual cortex of the contralateral hemisphere, and a grounding wire was attached under the  
521 skin on the neck. The head was fixed in position with a metal bar acutely attached with bone  
522 cement to the skull over the left hemisphere. We then made 2-mm diameter circular  
523 craniotomies above the IC (centered ~5 mm posterior from bregma and ~1 mm lateral from  
524 midline), over the visual cortex for auditory thalamic recordings (centered ~3 mm posterior  
525 from bregma and ~2.1 mm lateral from midline), and/or over the auditory cortex (centered  
526 ~2.5 mm posterior from bregma and ~4.5 mm lateral from midline). Following exposure of the  
527 brain, the exposed dura mater was kept moist with saline. The silicon probe was then inserted  
528 carefully into the recording site of interest.

529           The probe was considered to be located in the CNIC if frequency response areas  
530 (FRAs) followed the dorso-ventral tonotopic gradient from low- to high frequencies that is  
531 indicative of this nucleus<sup>67,68</sup>.

532           Prior to insertion into auditory thalamus, the probe was coated in Dil (Sigma-Aldrich)  
533 for subsequent histological verification of the recording site. Recording sites were confirmed  
534 as being located in auditory thalamus if multiunit activity responded to broadband noise and  
535 was frequency tuned when the tip of the probe was ~2.5-3.5 mm below the brain surface.  
536 Auditory thalamic recordings were subsequently attributed to MGBv by histological  
537 investigation of recording sites and by analysis of physiological responses. Based on an  
538 immunohistochemical study by Lu et al.<sup>69</sup> on the shape and size of subdivisions of the mouse  
539 auditory thalamus, we allocated recording sites to the MGBv if they responded reliably to DRC  
540 stimulation on electrode channels <500  $\mu$ m from the lateral border of the MGB (see data  
541 inclusion criteria).

542           Finally, A1 was identified by robust neuronal responses to broadband noise bursts,  
543 and a caudo-rostral tonotopic axis. Cortical tonotopy was assessed in 4/10 mice by estimating  
544 frequency response areas from responses to pure tones on 4 recording shanks spaced 200  $\mu$ m  
545 apart for 600  $\mu$ m along a rostro-caudal gradient.

546           For awake recordings in the IC, we chronically implanted a recording chamber under  
547 isoflurane (1.5-2% in O<sub>2</sub>) general anesthesia. The recording chamber consisted a metal cylinder

548 positioned over a craniotomy, with a lightly attached circular window in order to close the  
549 recording chamber. We placed the recording chamber above the IC, together with a head bar  
550 and a reference (silver wire) in the contralateral hemisphere. We then fixed the implant to the  
551 skull using a dental adhesive resin cement (Super Bond C&B). Following full recovery, on a  
552 subsequent day the mouse was head-fixed, the recording chamber was opened, and a sterile  
553 recording probe was acutely inserted into the brain via the recording chamber.

554

## 555 Optogenetics

### 556 *Injection of adeno-associated virus (AAV) into auditory cortex and transgenic expression of Chr2* 557 *for selective control of inhibitory cortical neurons.*

558 To transiently silence the activity of auditory cortical excitatory neurons, we employed either a  
559 transgenic or a viral approach to express Chr2 in auditory cortical inhibitory neurons. VGAT-  
560 Chr2-YFP mice express Chr2-YFP in GABAergic neurons throughout the adult brain and have  
561 been used extensively to silence cortical areas in mice<sup>21,70-72</sup>. Viral injection surgeries were  
562 performed under isoflurane (~1.5 %) anesthesia, with the animal positioned in a stereotaxic  
563 frame (Kopf instruments, USA). For viral transfection, we injected a floxed AAV5-DIO-Chr2-  
564 eYFP (UNC gene therapy vector core) into auditory cortex of GAD2-IRES-cre mice. We injected  
565 ~400 nl of virus, spread over 3 locations (spaced caudal-rostrally ~400  $\mu\text{m}$  apart) at 3 depths  
566 (700, 500 and 300  $\mu\text{m}$  from cortical surface), to ensure widespread expression in auditory  
567 cortex (Supplementary Fig. 5a). Mice were used for electrophysiological recordings >4 weeks  
568 post injection of virus. This ensured strong expression of Chr2-eYFP in the auditory cortex.

569

## 570 Optogenetic silencing of auditory cortex

571 For optogenetic silencing, we exposed the auditory cortex to blue (470 nm) LED light. This was  
572 achieved by placement of a 200  $\mu\text{m}$  (VGAT-Chr2-YFP experiments) or 1 mm optical fiber  
573 (GAD2-cre + viral Chr2 experiments) immediately above the dura mater over the auditory  
574 cortex to allow for blue light exposure to Chr2-expressing cells. For silencing of auditory  
575 cortical activity during recordings in MGBv or CNIC, we stimulated with blue light at 40 Hz  
576 frequency using sinusoidal waves or 15 ms pulses (10 ms gaps). When recording from auditory  
577 cortex, we stimulated with blue light at 40 Hz using either sinusoidal waves or 15 ms pulses  
578 (10 ms gaps) or constant light stimulation. Light power was ~5-7  $\text{mW}/\text{mm}^2$  at the tip of the

579 fiber. We found that light stimulation (40 Hz (sinusoid or pulsed) or constant light) effectively  
580 silenced activity in auditory cortical neurons by driving inhibitory neurons for the duration of  
581 the DRC stimulation (5 seconds) (Supplementary Fig. 5).

582

### 583 [Human psychoacoustic experiments](#)

584 Stimulus presentation and response collection were performed using PsychoPy 1.85.6<sup>73,74</sup>.  
585 Sounds were presented using a MOTU 828 mkII soundcard and delivered via Sennheiser  
586 650HD headphones in a sound-attenuated chamber. The headphones were calibrated to a flat  
587 ( $\pm 1$  dB) frequency-level response between 125 and 19,500 Hz.

588 Stimuli consisted of broadband noise bursts (100 ms) and dynamic random chords  
589 (DRCs) comprising 25-ms duration chords with 29 frequencies logarithmically spaced between  
590 150 and 19,200 Hz. DRCs were constructed with each tone of the DRC being played at levels  
591 randomly assigned from a uniform distribution, ranging from 35 – 45 dB SPL (low contrast) or  
592 25 – 55 dB SPL (high contrast) around a fixed mean amplitude of 40 dB SPL. The total sound  
593 amplitude of the DRCs was measured to be 64-69 dB SPL. The stimulus for each trial was 1,950  
594 ms long, consisting of 1,000 ms of DRC, followed by 100 ms broadband noise (reference: 60 dB  
595 SPL), 250 ms of DRC, 100 ms of broadband noise (Target: 52 – 68 dB SPL), and ending with 500  
596 ms of DRC. The overall sound level of high contrast stimuli was slightly higher relative to low  
597 contrast stimuli ( $\sim 4$  dB).

598 A control experiment was also carried out, where the overall sound levels of DRCs were  
599 matched in low and high contrast stimuli, at the expense of the equality of levels of individual  
600 tone levels in the DRCs, to determine whether the small difference in overall sound amplitude  
601 between the high and low contrast stimuli could account for the JND change with contrast  
602 (Supplementary Fig. 1).

603

### 604 [Quantification and statistical analysis](#)

#### 605 [Physiology](#)

##### 606 *Spike sorting*

607 We clustered potential neuronal spikes using KiloSort<sup>75</sup> ([https://github.com/cortex-](https://github.com/cortex-lab/KiloSort)  
608 [lab/KiloSort](https://github.com/cortex-lab/KiloSort)). Following this automatic clustering step, we manually inspected the clusters in



609 Phy (<https://github.com/kwikteam/phy>), and removed noise (movement artefacts,  
610 optogenetic light artefacts etc.). We assessed clusters according to suggested guidelines  
611 published by Stephen Lenzi and Nick Steinmetz ([https://phy-](https://phy-contrib.readthedocs.io/en/latest/template-gui/#user-guide)  
612 [contrib.readthedocs.io/en/latest/template-gui/#user-guide](https://phy-contrib.readthedocs.io/en/latest/template-gui/#user-guide)).

613

#### 614 *Signal power and noise power*

615 In order to identify units that were continuously responsive to DRC stimulation, we measured  
616 the signal power (SP) and noise power (NP) of the neural responses<sup>76</sup>. For all results, unless  
617 otherwise specified, we excluded units for which the ratio NP/SP > 60, indicating that these  
618 units did not respond reliably to the DRCs on repeated trials.

619 Where relevant, we also tested how well a linear model described the data, using  
620 cross-validation. We fitted spectro-temporal linear filters to 80-90 % of the data (training  
621 dataset) and tested how well the model predicted the responses on the remaining data (test  
622 dataset). Units were excluded if the correlation coefficient (Pearson's  $r$ ) between predicted  
623 and real responses in the test dataset was < 0.1. These cross-validated prediction values are  
624 referred to as ' $cc_{pred}$ ', indicating cross-validated correlation between the predicted response  
625 and the actual response.

626

#### 627 *Linear spectro-temporal receptive fields*

628 Neuronal response rates were binned to produce peri-stimulus time histograms (PSTHs) at the  
629 same temporal resolution (25 ms) as the chords in the DRCs. To exclude transient onset  
630 responses, we excluded the first 500 ms of each stimulus and response. Linear spectro-  
631 temporal receptive fields (STRFs,  $k_{fh}$ ) were then estimated to describe the relationship  
632 between the PSTHs and the sound levels (in dB SPL) of the tones in the DRCs. The STRFs were  
633 constrained to be space-time separable, i.e.  $k_{fh} = k_f \otimes k_h$ , and were fitted using maximum  
634 likelihood<sup>77</sup>. The separability constraint was used because it reduces the number of  
635 parameters that need to be estimated, and can give good STRFs when experimental data are  
636 limited<sup>11</sup>. We found that this approach produced acceptable STRFs in all three areas that we  
637 recorded from.

638 For each unit, STRFs were first fitted to data from individual contrast conditions  
639 separately, in order to assess contrast-dependent changes in spectro-temporal structure.

640 Subsequently, a single overall STRF was fitted to data from both contrasts, for estimation of  
641 contrast-dependent output nonlinearities.

642

### 643 *Contrast-dependent output nonlinearities*

644 For each contrast condition, we fitted a sigmoid function to the relationship between the  
645 actual firing rate of each neuron and the responses predicted by the unit's overall STRF<sup>78,79</sup>:

$$\hat{y}_t = a + \frac{b}{1 + e^{-(z_t - c)d}}$$

646 By estimating the parameters of the sigmoids in different contrast conditions ( $a$  = y-offset,  $b$  =  
647 y-range,  $c$  = x-offset,  $b/(4d)$  = gain), we were then able to estimate contrast-dependent  
648 changes in the response properties of each unit.

649 Contrast gain control was measured as percentage compensation in response to a  
650 doubling of contrast, where complete (100%) compensation is defined as a halving of gain, and  
651 no compensation is defined as no change in gain:

$$\% \text{ compensation} = \frac{C_{low}(G_{low} - G_{high})}{G_{high}(C_{high} - C_{low})} \times 100$$

652 For the other variables, we report the percentage change between the values in high  
653 ( $V_{high}$ ) and low conditions ( $V_{low}$ ), relative to the low contrast value:

$$\% \text{ change} = \left( \frac{V_{high} - V_{low}}{V_{low}} \right) \times 100$$

654

### 655 *Contrast-dependent LN model with adaptation time constants*

656 In order to estimate adaptation dynamics during changing contrast, we used a contrast-  
657 dependent LN model where the LN model parameters vary smoothly between their low and  
658 high contrast values, depending on the exponentially-weighted history of recent stimulus  
659 contrast. For example:

$$a = a_{low} + (a_{high} - a_{low}) \sum \frac{C_t}{n_t} \exp(-t/\tau')$$

660 where  $a_{low}$  and  $a_{high}$  are the values of  $a$  in the low and high contrast conditions, respectively,  
661  $C_t$  is 0 for low contrast and 1 for high contrast,  $t$  indexes the time bins,  $n_t$  is the number of  
662 time bins and  $\tau'$  is the time constant of the exponential in bins, corresponding to a time  
663 constant  $\tau$  in ms. The dataset used to estimate the adaptation time course switched between  
664 high (40 dB) and low (20 dB) contrast every 2 seconds. Contrast-dependent LN parameters  
665 were estimated from the last second of each contrast presentation. We allowed a maximum  $\tau$   
666 of 700 ms, which is the longest value that could be reliably estimated from 2-second epochs.  
667 All parameters of the LN model were contrast dependent, and the full model containing LN  
668 model parameters from both contrasts along with the estimation of  $\tau$  were optimized by  
669 gradient descent to minimize the square error between predicted firing rate and the actual  
670 firing rate.

671 In addition to the inclusion criteria used in the LN models for contrast adaptation  
672 estimation (see below), we further restricted analysis of time constants to units whose activity  
673 was better described by a contrast-dependent LN model than a single contrast-independent  
674 model. Consequently, we estimated contrast adaptation time constants only from units that  
675 underwent contrast adaptation.

676

### 677 Psychophysics

678 We fitted psychometric functions<sup>80</sup> (<https://github.com/wichmann-lab/psignifit>) to the  
679 probability of participants indicating that the target sound was louder than the reference  
680 sound. The just noticeable difference (JND) was estimated as the dB difference between the  
681 25% and 75% points on the psychometric curve. Because each listener's sensitivity is inversely  
682 proportional to their JND, we assume that the effective gain of the level discrimination process  
683 is also inversely proportional to JND, and therefore % compensation can be calculated  
684 similarly to the % compensation of contrast gain control above.

685

### 686 Neurometric behavioral prediction model

687 We predicted perceptual contrast adaptation using contrast-dependent LN model simulated  
688 responses. We simulated responses to novel broadband noise stimuli of different sound levels

689 (Reference: 70 dB SPL, Target: 62-78dB SPL) embedded in low or high contrast DRCs (similar to  
690 the stimuli used in the psychophysics experiment). This was achieved using response  
691 predictions to these novel stimuli from the contrast-dependent LN model estimated from  
692 recorded units in the CNIC, MGBv and A1. This was done for every unit included in the  
693 analyses of physiological contrast adaptation (separately for each processing level/anesthetic  
694 state). For each simulated trial, the simulated response to the broadband noise for each unit  
695 was discretized according to a Poisson process, and the simulated onset responses across units  
696 were added together. We then asked which noise stimulus elicited most spikes in the  
697 simulated trial. If the reference noise elicited fewer spikes than the target noise stimulus, we  
698 predicted a “louder” response (Fig. 7a). This process was repeated 500 times for each sound  
699 level, in each contrast condition, for estimation of a predicted contrast-dependent  
700 psychometric curve from simulated neuronal responses from units in the CNIC (awake or  
701 anesthetized), MGBv or A1 (Fig. 7b). We estimated predicted psychometric curves 25 times for  
702 each processing level/anesthetic state.

703

#### 704 [Data and software availability](#)

705 Electrophysiological data are available upon request to, and will be fulfilled by, the lead  
706 contact ([michael.lohse@dpag.ox.ac.uk](mailto:michael.lohse@dpag.ox.ac.uk)). Matlab code for executing linear-nonlinear models  
707 used in this paper can be found on <https://github.com/beniamino38/benlib>.

708

709

#### 710 [References](#)

- 711 1. Webster, M. A. Evolving concepts of sensory adaptation. *F1000 Biol. Rep.* **4**, 1–7 (2012).
- 712 2. Brenner, N., Bialek, W. & de Ruyter van Steveninck, R. Adaptive rescaling maximizes  
713 information transmission. *Neuron* **26**, 695–702 (2000).
- 714 3. Fairhall, A. L., Geoffrey, L. D., Bialek, W. & de Ruyter van Steveninck, R. R. Efficiency and  
715 ambiguity in an adaptive neural code. *Nature* **412**, 787–792 (2001).
- 716 4. Laughlin, S. B. The role of sensory adaptation in the retina. *J. Exp. Biol.* **146**, 39–62  
717 (1989).

- 718 5. Mesgarani, N., David, S. V., Fritz, J. B. & Shamma, S. A. Mechanisms of noise robust  
719 representation of speech in primary auditory cortex. *Proc. Natl. Acad. Sci.* **111**, 6792–  
720 6797 (2014).
- 721 6. Rabinowitz, N. C., Willmore, B. D. B., King, A. J. & Schnupp, J. W. H. Constructing noise-  
722 invariant representations of sound in the auditory pathway. *PLoS Biol.* **11**, 1–18 (2013).
- 723 7. Shapley, R. & Enroth-Cugell, C. Visual adaptation and retinal gain control. *Prog. Retin.*  
724 *Res.* **3**, 263–346 (1984).
- 725 8. Robinson, B. L., Harper, N. S. & McAlpine, D. Meta-adaptation in the auditory midbrain  
726 under cortical influence. *Nat. Commun.* **7**, 1–8 (2016).
- 727 9. Wen, B., Wang, G. I., Dean, I. & Delgutte, B. Dynamic range adaptation to sound level  
728 statistics in the auditory nerve. *J. Neurosci.* **29**, 13797–13808 (2009).
- 729 10. Dean, I., Harper, N. S. & McAlpine, D. Neural population coding of sound level adapts to  
730 stimulus statistics. *Nat. Neurosci.* **8**, 1684–1689 (2005).
- 731 11. Rabinowitz, N. C., Willmore, B. D. B., Schnupp, J. W. H. & King, A. J. Contrast gain  
732 control in auditory cortex. *Neuron* **70**, 1178–1191 (2011).
- 733 12. Shapley, R. & Victor, J. D. The contrast gain control of the cat retina. *Vision Res.* **19**,  
734 431–434 (1979).
- 735 13. Ohzawa, I., Sclar, G. & Freeman, R. D. Contrast gain control in the cat's visual system. *J.*  
736 *Neurophysiol.* **54**, 651–667 (1985).
- 737 14. Rieke, F. Temporal contrast adaptation in salamander bipolar cells. *J. Neurosci.* **21**,  
738 9445–9454 (2001).
- 739 15. Solomon, S. G., Peirce, J. W., Dhruv, N. T. & Lennie, P. Profound contrast adaptation  
740 early in the visual pathway. *Neuron* **42**, 155–162 (2004).
- 741 16. Baccus, S. A. & Meister, M. Fast and slow contrast adaptation in retinal circuitry.  
742 *Neuron* **36**, 909–919 (2002).
- 743 17. Bonin, V. The suppressive field of neurons in lateral geniculate nucleus. *J. Neurosci.* **25**,  
744 10844–10856 (2005).
- 745 18. Gardner, J. L. *et al.* Contrast adaptation and representation in human early visual

- 746 cortex. *Neuron* **47**, 607–620 (2005).
- 747 19. Sclar, G., Lennie, P. & DePriest, D. D. Contrast adaptation in striate cortex of macaque.  
748 *Vision Res.* **29**, 747–755 (1989).
- 749 20. Maffei, L., Fiorentini, A. & Bisti, S. Neural correlate of perceptual adaptation to gratings.  
750 *Science* **182**, 1036–1038 (1973).
- 751 21. King, J. L., Lowe, M. P., Stover, K. R., Wong, A. A. & Crowder, N. A. Adaptive processes  
752 in Thalamus and cortex revealed by silencing of primary visual cortex during contrast  
753 adaptation. *Curr. Biol.* **26**, 1295–1300 (2016).
- 754 22. Greenlee, M. W. & Heitger, F. The functional role of contrast adaptation. *Vision Res.* **28**,  
755 791–797 (1988).
- 756 23. Cooke, J. E., King, A. J., Willmore, B. D. B. & Schnupp, J. W. H. Contrast gain control in  
757 mouse auditory cortex. *J. Neurophysiol.* **120**, 1872–1884 (2018).
- 758 24. Wimmer, R. D. *et al.* Thalamic control of sensory selection in divided attention. *Nature*  
759 **526**, 705–709 (2015).
- 760 25. Lohse, M. *et al.* Motor cortex can modulate somatosensory processing via cortico-  
761 thalamo-cortical pathway. *bioRxiv* (2018). doi:10.1101/366567
- 762 26. Schneider, D. M., Sundararajan, J. & Mooney, R. A cortical filter that learns to suppress  
763 the acoustic consequences of movement. *Nature* **561**, 391–395 (2018).
- 764 27. Williamson, R. S. *et al.* Input-specific gain modulation by local sensory context shapes  
765 cortical and thalamic responses to complex sounds. *Neuron* **91**, 467–481 (2016).
- 766 28. Lohse, M., Bajo, V. M. & King, A. J. Development, organization and plasticity of auditory  
767 circuits: Lessons from a cherished colleague. *Eur. J. Neurosci.* **49**, 990-1004 (2019).
- 768 29. Guo, W., Clause, A. R., Barth-Marion, A. & Polley, D. B. A Corticothalamic circuit for  
769 dynamic switching between feature detection and discrimination. *Neuron* **95**, 180–194  
770 (2017).
- 771 30. Zhang, Y. & Suga, N. Modulation of responses and frequency tuning of thalamic and  
772 collicular neurons by cortical activation in mustached bats. *J. Neurophysiol.* **84**, 325–  
773 333 (2000).

- 774 31. Zhang, Y., Suga, N. & Yan, J. Corticofugal modulation of frequency processing in bat  
775 auditory system. *Nature* **387**, 900–903 (1997).
- 776 32. Tang, J., Yang, W. & Suga, N. Modulation of thalamic auditory neurons by the primary  
777 auditory cortex. *J. Neurophysiol.* **108**, 935–942 (2012).
- 778 33. Zhou, X. & Jen, P. H. S. Corticofugal modulation of directional sensitivity in the midbrain  
779 of the big brown bat, *Eptesicus fuscus*. *Hear. Res.* **203**, 201–215 (2005).
- 780 34. Nakamoto, K. T., Jones, S. J. & Palmer, A. R. Descending projections from auditory  
781 cortex modulate sensitivity in the midbrain to cues for spatial position. *J. Neurophysiol.*  
782 **99**, 2347–2356 (2008).
- 783 35. Yan, W. & Suga, N. Corticofugal modulation of the midbrain frequency map in the bat  
784 auditory system. *Nat. Neurosci.* **1**, 54–58 (1998).
- 785 36. Winer, J. A. Decoding the auditory corticofugal systems. *Hear. Res.* **212**, 1–8 (2006).
- 786 37. Carandini, M. & Heeger, D. J. Normalization as a canonical neural computation. *Nat.*  
787 *Rev. Neurosci.* **13**, 51–62 (2012).
- 788 38. Miller, L. M., Escabí, M. A., Read, H. L. & Schreiner, C. E. Spectrotemporal receptive  
789 fields in the lemniscal auditory thalamus and cortex. *J. Neurophysiol.* **87**, 516–527  
790 (2002).
- 791 39. Escabi, M. A. & Read, H. L. Representation of spectrotemporal sound information in the  
792 ascending auditory pathway. *Biol. Cybern.* **89**, 350–362 (2003).
- 793 40. Dean, I., Robinson, B. L., Harper, N. S. & McAlpine, D. Rapid neural adaptation to sound  
794 level statistics. *J. Neurosci.* **28**, 6430–6438 (2008).
- 795 41. Willmore, B. D. B., Cooke, J. E. & King, A. J. Hearing in noisy environments: Noise  
796 invariance and contrast gain control. *J. Physiol.* **592**, 3371–3381 (2014).
- 797 42. Rabinowitz, N. C., Willmore, B. D. B., Schnupp, J. W. H. & King, A. J. Spectrotemporal  
798 contrast kernels for neurons in primary auditory cortex. **32**, 11271–11284 (2012).
- 799 43. King, A. J., Teki, S. & Willmore, B. D. B. Recent advances in understanding the auditory  
800 cortex. *F1000Research* **7**, 1555 (2018).
- 801 44. Prinz, A. A., Bucher, D. & Marder, E. Similar network activity from disparate circuit

- 802 parameters. *Nat. Neurosci.* **7**, 1345–1352 (2004).
- 803 45. Grashow, R., Brookings, T. & Marder, E. Reliable neuromodulation from circuits with  
804 variable underlying structure. *Proc. Natl. Acad. Sci.* **106**, 11742–11746 (2009).
- 805 46. Luo, F., Wang, Q., Kashani, A. & Yan, J. Corticofugal modulation of initial sound  
806 processing in the brain. *J. Neurosci.* **28**, 11615–11621 (2008).
- 807 47. Ma, X. & Suga, N. Long-term cortical plasticity evoked by electric stimulation and  
808 acetylcholine applied to the auditory cortex. *Proc. Natl. Acad. Sci.* **102**, 9335–9340  
809 (2005).
- 810 48. Villa, A. E. P. *et al.* Corticofugal modulation of the information processing in the  
811 auditory thalamus of the cat. *Exp. Brain Res.* **86**, 506–517 (1991).
- 812 49. Przybyszewski, A. W., Gaska, J. P., Foote, W. & Pollen, D. A. Striate cortex increases  
813 contrast gain of macaque LGN neurons. *Vis. Neurosci.* **17**, 485–494 (2000).
- 814 50. Webb, B. E. N. S. *et al.* Feedback from V1 and inhibition from beyond the classical  
815 receptive field modulates the responses of neurons in the primate lateral geniculate  
816 nucleus. 583–592 (2002).
- 817 51. Ghazanfar, A. A., Krupa, D. J. & Nicolelis, M. A. L. Role of cortical feedback in the  
818 receptive field structure and nonlinear response properties of somatosensory thalamic  
819 neurons. *Exp. Brain Res.* **141**, 88–100 (2001).
- 820 52. Temereanca, S. & Simons, D. J. Functional topography of corticothalamic feedback  
821 enhances thalamic spatial response tuning in the somatosensory whisker/barrel  
822 system. *Neuron* **41**, 639–651 (2004).
- 823 53. Suga, N., Zhang, Y. & Yan, J. Sharpening of frequency tuning by inhibition in the  
824 thalamic auditory nucleus of the mustached bat. *J. Neurophysiol.* **77**, 2098–114 (1997).
- 825 54. Zhang, Y. & Suga, N. Corticofugal amplification of subcortical responses to single tone  
826 stimuli in the mustached bat. *J. Neurophysiol.* **78**, 3489–3492 (1997).
- 827 55. Homma, N. Y. *et al.* A Role for auditory corticothalamic feedback in the perception of  
828 complex sounds. *J. Neurosci.* **37**, 6149–6161 (2017).
- 829 56. Crandall, S. R., Cruikshank, S. J. & Connors, B. W. A corticothalamic switch: controlling



- 830 the thalamus with dynamic synapses. *Neuron* **86**, 768–782 (2015).
- 831 57. Antunes, F. M. & Malmierca, M. S. Effect of auditory cortex deactivation on stimulus-  
832 specific adaptation in the medial geniculate body. *J. Neurosci.* **31**, 17306–17316 (2011).
- 833 58. Slee, S. J. & David, S. V. Rapid task-related plasticity of spectrotemporal receptive fields  
834 in the auditory midbrain. *J. Neurosci.* **35**, 13090–13102 (2015).
- 835 59. Wolfart, J., Debay, D., Le Masson, G., Destexhe, A. & Bal, T. Synaptic background  
836 activity controls spike transfer from thalamus to cortex. *Nat. Neurosci.* **8**, 1760–1767  
837 (2005).
- 838 60. Briggs, F. & Usrey, W. M. Emerging views of corticothalamic function. *Curr. Opin.*  
839 *Neurobiol.* **18**, 403–407 (2008).
- 840 61. Dahmen, J. C., Keating, P., Nodal, F. R., Schulz, A. L. & King, A. J. Adaptation to stimulus  
841 statistics in the perception and neural representation of auditory space. *Neuron* **66**,  
842 937–948 (2010).
- 843 62. Stange, A. *et al.* Adaptation in sound localization: from GABA B receptor-mediated  
844 synaptic modulation to perception. *Nat. Neurosci.* **16**, 1840–1847 (2013).
- 845 63. Carrasco, M., Ling, S. & Read, S. Attention alters appearance. *Nat. Neurosci.* **7**, 308–313  
846 (2004).
- 847 64. Reynolds, J. H., Pasternak, T., Desimone, R. & York, N. Attention increases sensitivity of  
848 V4 neurons. **26**, 703–714 (2000).
- 849 65. Mianné, J. *et al.* Correction of the auditory phenotype in C57BL/6N mice via  
850 CRISPR/Cas9-mediated homology directed repair. *Genome Med.* **8**, 1–12 (2016).
- 851 66. Gill, P., Zhang, J., Woolley, S. M. N., Fremouw, T. & Theunissen, F. E. Sound  
852 representation methods for spectro-temporal receptive field estimation. *J. Comput.*  
853 *Neurosci.* **21**, 5–20 (2006).
- 854 67. Stiebler, I. & Ehret, G. Inferior colliculus of the house mouse. I. A quantitative study of  
855 tonotopic organization, frequency representation, and tone threshold distribution. *J.*  
856 *Comp. Neurol.* **238**, 65–76 (1985).
- 857 68. Portfors, C. V., Mayko, Z. M., Jonson, K., Cha, G. F. & Roberts, P. D. Spatial organization

- 858 of receptive fields in the auditory midbrain of awake mouse. *Neuroscience* **193**, 429–  
859 439 (2011).
- 860 69. Lu, E., Llano, D. A. & Sherman, S. M. Different distributions of calbindin and calretinin  
861 immunostaining across the medial and dorsal divisions of the mouse medial geniculate  
862 body. *Hear. Res.* **257**, 16–23 (2009).
- 863 70. Guo, J. Z. *et al.* Cortex commands the performance of skilled movement. *Elife* **4**, 1–18  
864 (2015).
- 865 71. Guo, Z. V. *et al.* Maintenance of persistent activity in a frontal thalamocortical loop.  
866 *Nature* **545**, 181–186 (2017).
- 867 72. Kato, H. K., Gillet, S. N. & Isaacson, J. S. Flexible sensory representations in auditory  
868 cortex driven by behavioral relevance. *Neuron* **88**, 1027–1039 (2015).
- 869 73. Peirce, J. W. Generating stimuli for neuroscience using PsychoPy. *Front. Neuroinform.*  
870 **2**, 1–8 (2008).
- 871 74. Peirce, J. W. PsychoPy-Psychophysics software in Python. *J. Neurosci. Methods* **162**, 8–  
872 13 (2007).
- 873 75. Pachitariu, M., Steinmetz, N. A., Kadir, S., Carandini, M. & Harris, K. D. Kilosort: realtime  
874 spike-sorting for extracellular electrophysiology with hundreds of channels. *bioRxiv*  
875 061481 (2016).
- 876 76. Sahani, M. & Linden, J. F. How linear are auditory cortical responses? *Adv. Neural Inf.*  
877 *Process. Syst.* **15**, 109–116 (2003).
- 878 77. Ahrens, M. B., Linden, J. F. & Sahani, M. Nonlinearities and contextual influences in  
879 auditory cortical responses modeled with multilinear spectrotemporal methods. *J.*  
880 *Neurosci.* **28**, 1929–1942 (2008).
- 881 78. Schwartz, O., Pillow, J. W., Rust, N. C. & Simoncelli, E. P. Spike-triggered neural  
882 characterization. *J. Vis.* **6**, 484–507 (2006).
- 883 79. Chichilnisky, E. J. A simple white noise analysis of neuronal light responses. *Netw.*  
884 *Comput. Neural Syst.* **12**, 1–15 (2001).
- 885 80. Wichmann, F. A. & Hill, N. J. The psychometric function: I. Fitting, sampling, and

886            goodness of fit. *Percept. Psychophys.* **63**, 1293–1313 (2001).

887

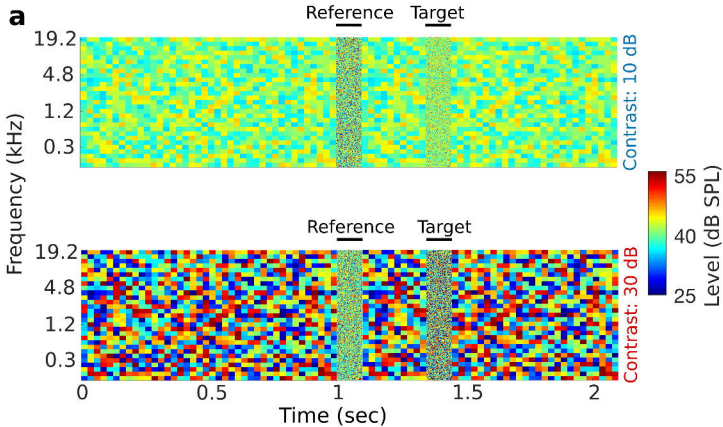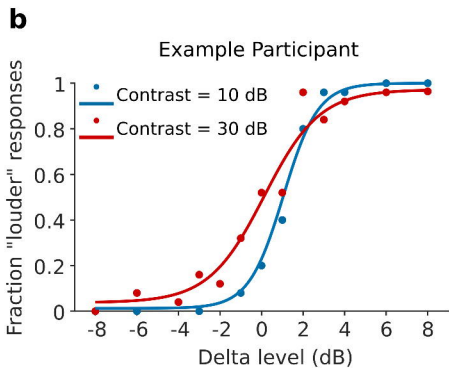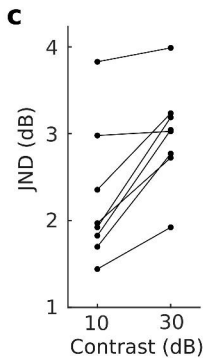

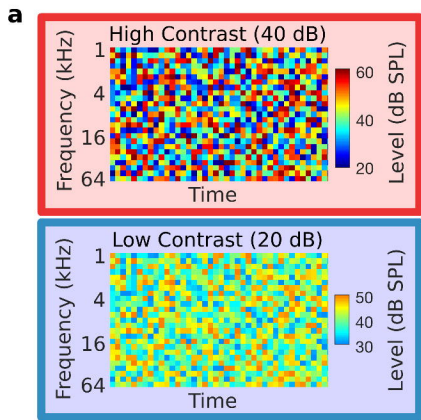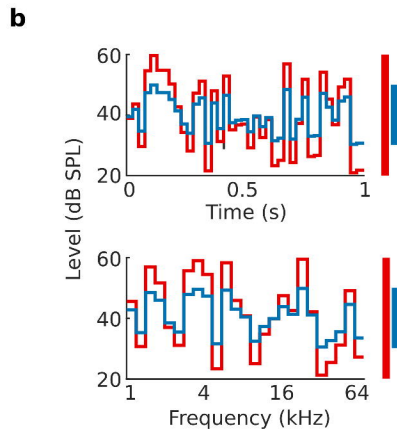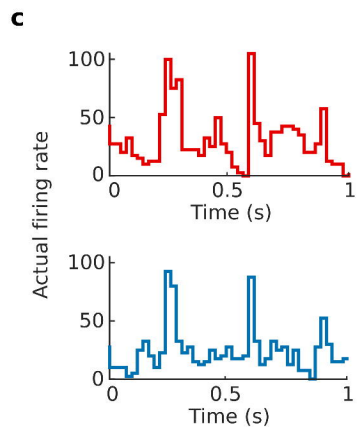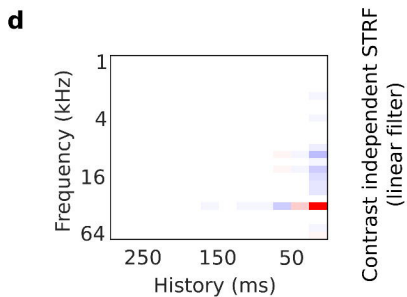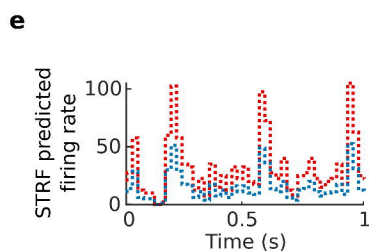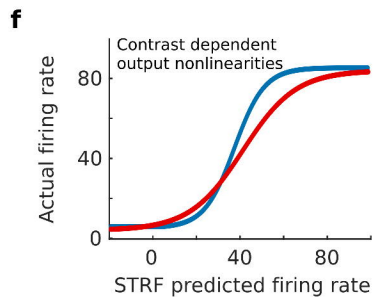

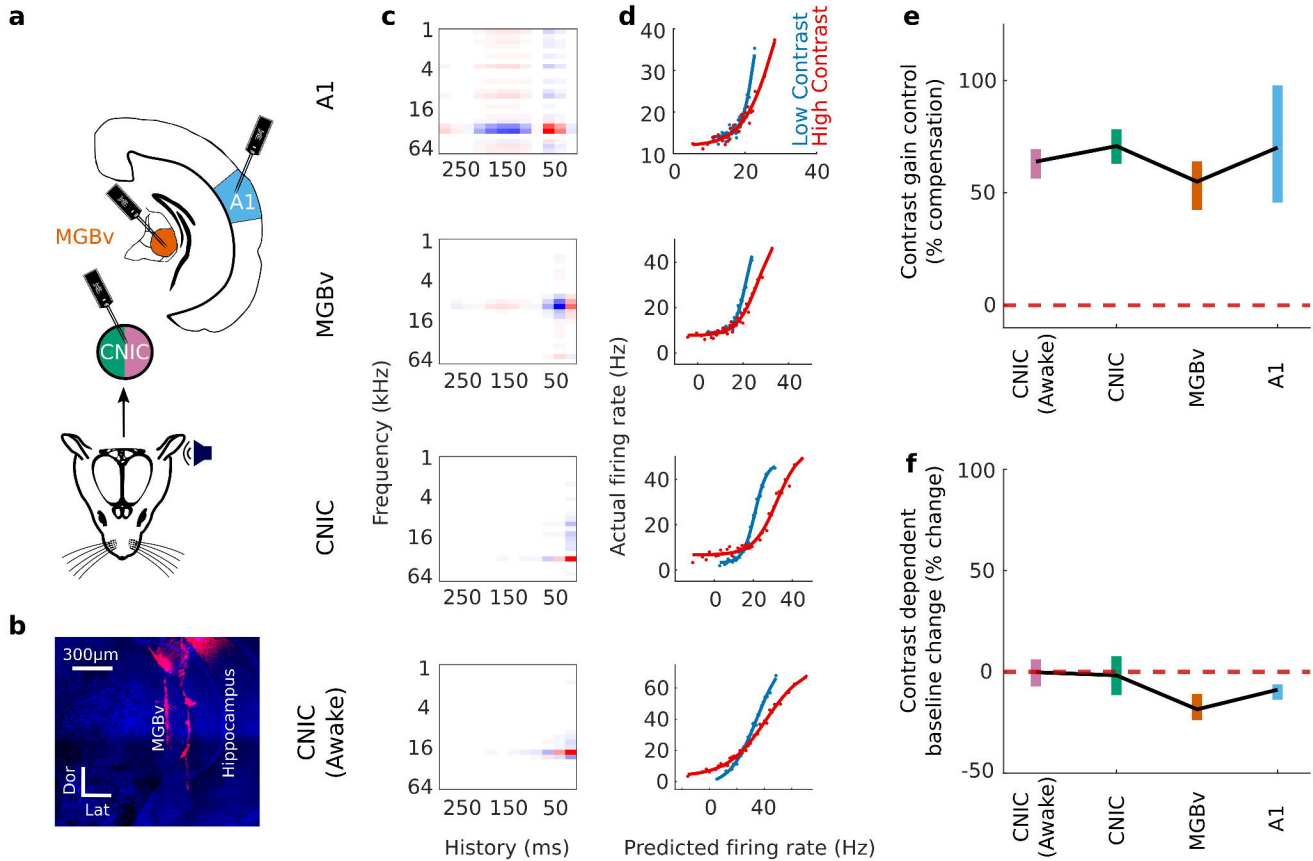

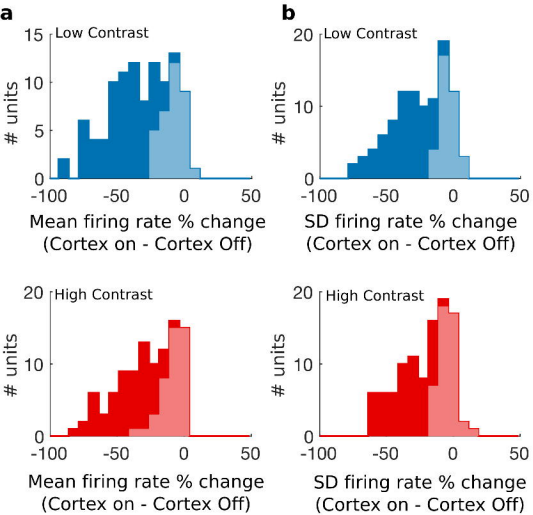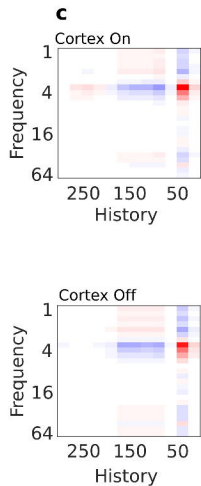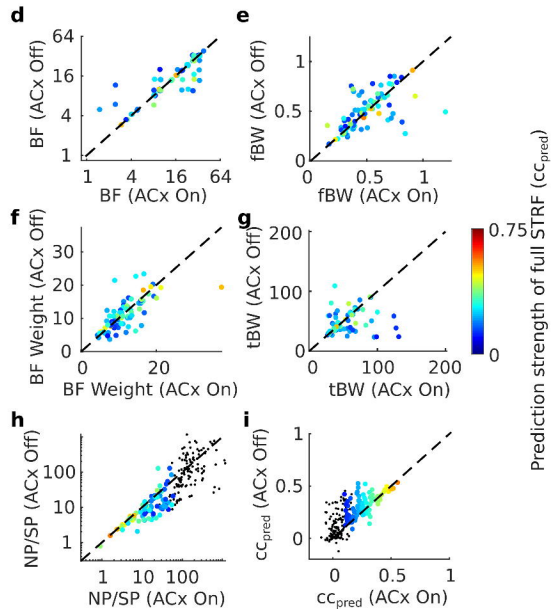

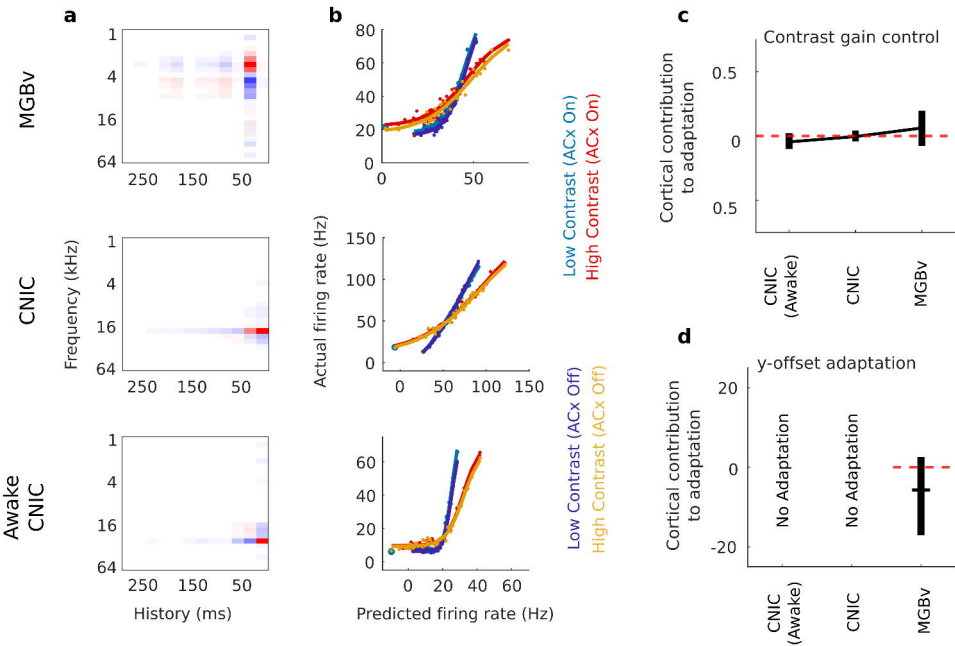



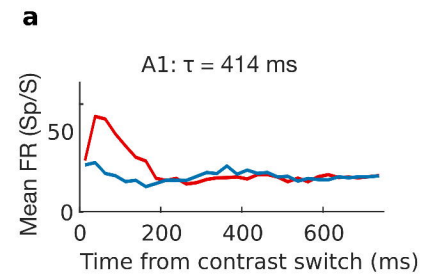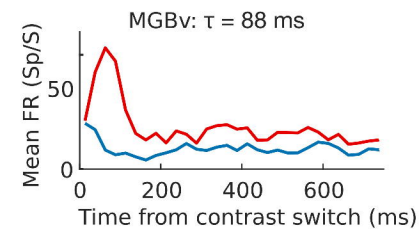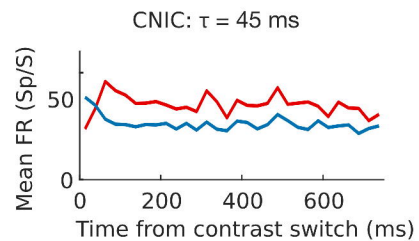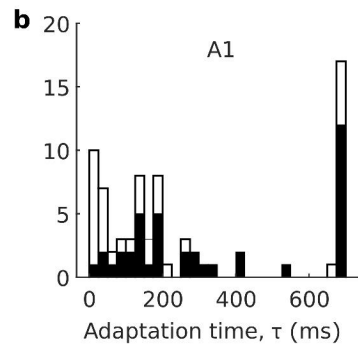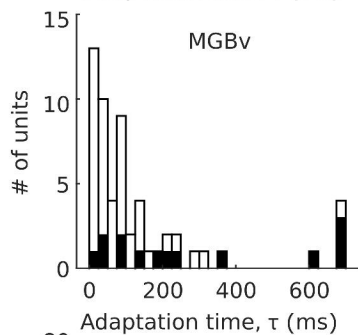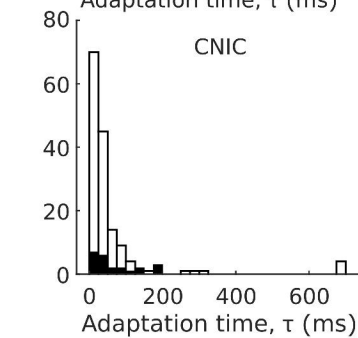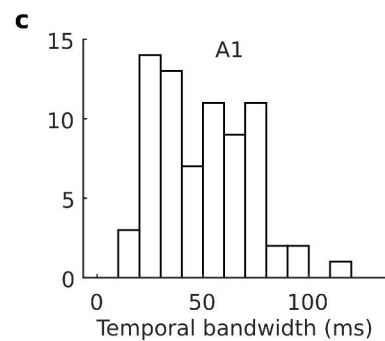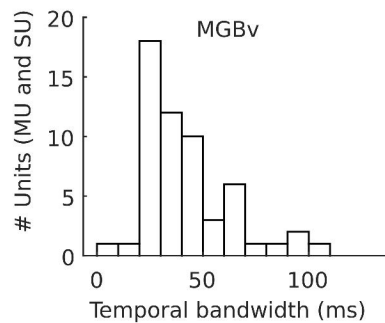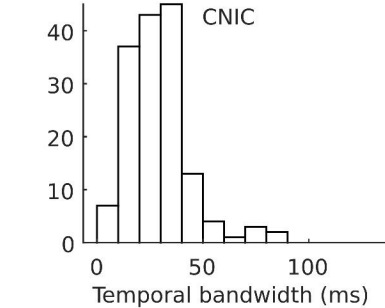

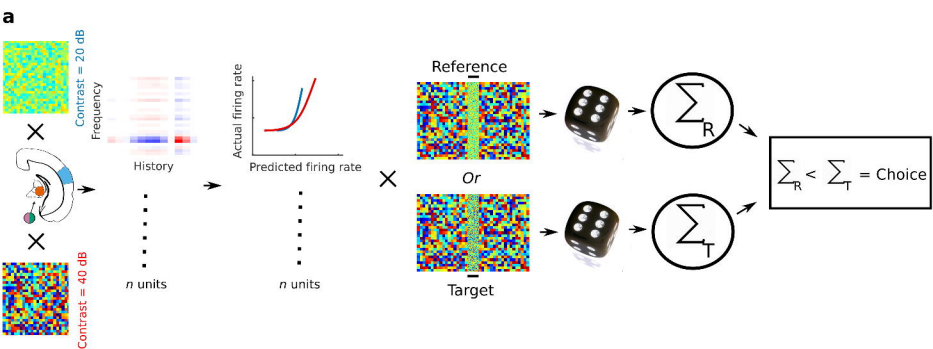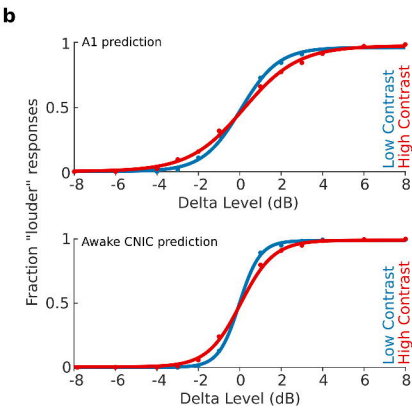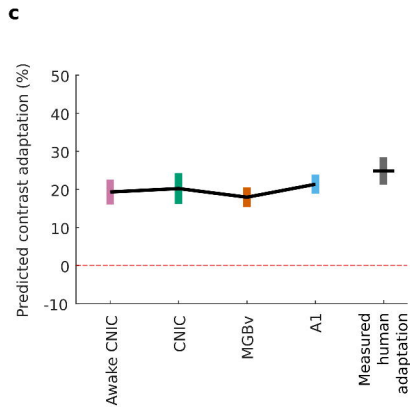

Source: https://www.biorxiv.org/content/10.1101/702506v1.full.pdf
